# Supplementary material for: Targeting Galectin 3 illuminates its contributions to the pathology of uterine serous carcinoma
Source: PubMed Central journal article supplement (PMC11058234; doi:10.1038/s41416-024-02621-x), 2024-03-04

## Supplementary figures

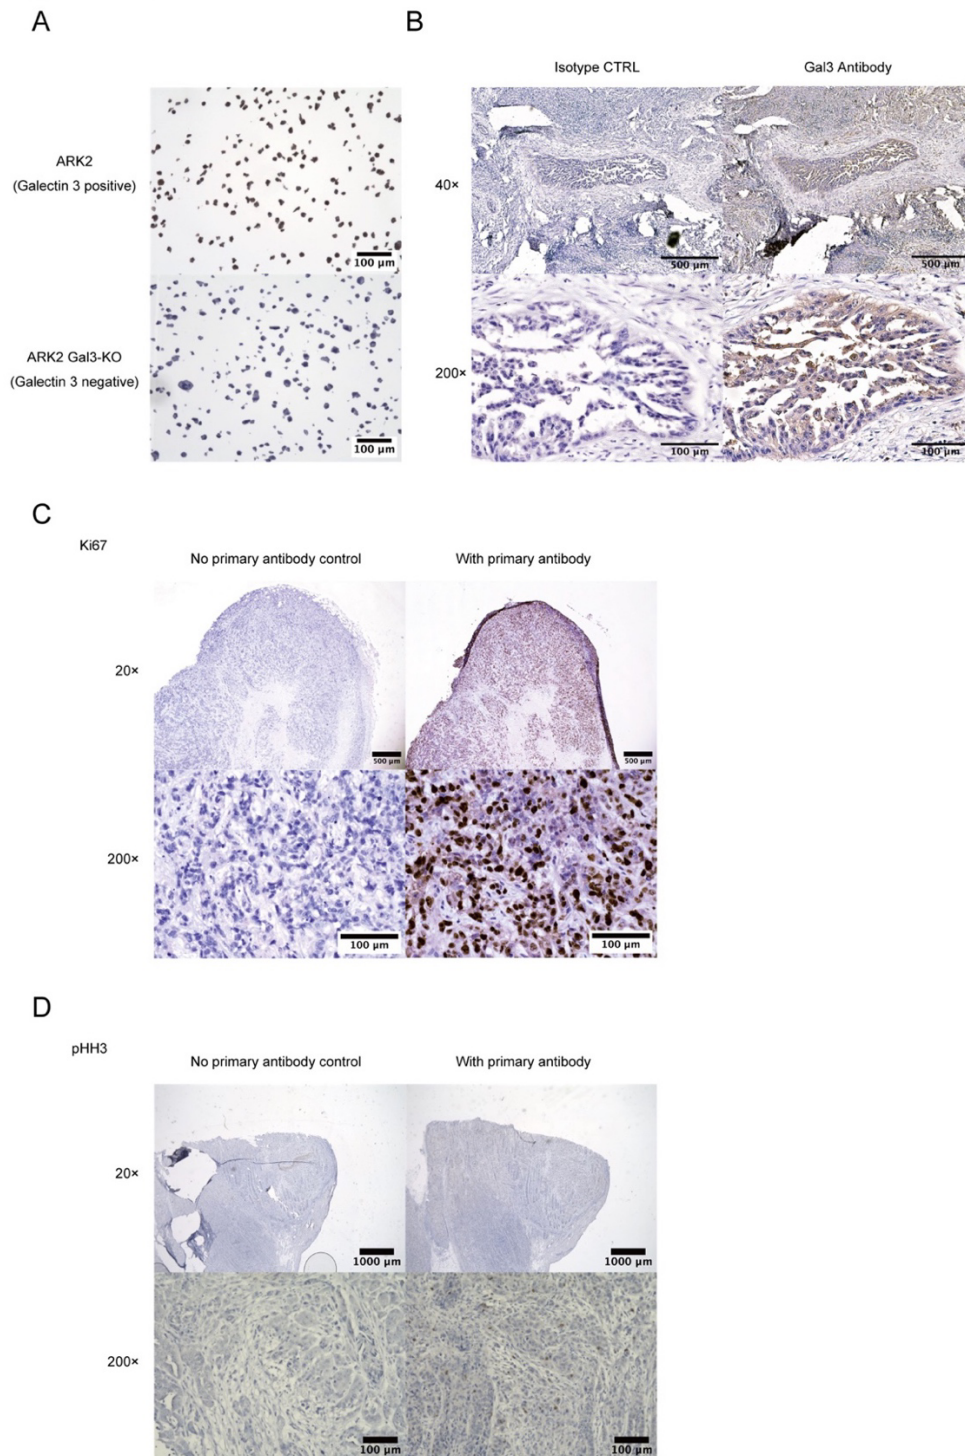

**Supplementary Fig. S1:** Validation of antibodies. A) Validation of anti-Gal3 antibody using Gal3 positive control (ARK2) and negative control (ARK2 Gal3-KO cells). B) Validation of anti-Gal3 antibody using isotype control. C) Validation of anti-Ki67 antibody. D) Validation of anti-pHH3 antibody.

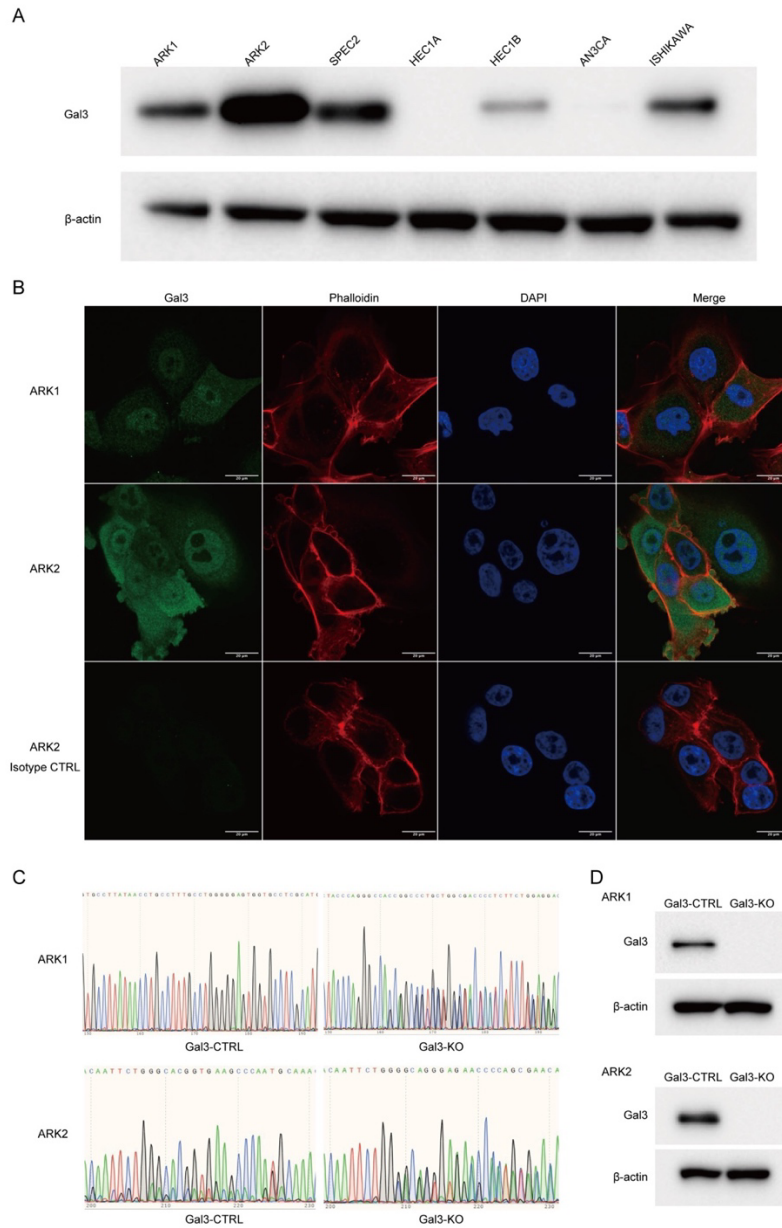

**Supplementary Fig. S2: Confirmation of Gal3 expression, distribution, and Gal3-KO.** A) Gal3 expression in endometrial cancer cell lines. ARK1, ARK2, and SPEC2 are derived from USC, while HEC1A, HEC1B, AN3CA, and Ishikawa cells were derived from endometrioid cancer. B) ICC images of Gal3 distribution. Distribution of Gal3 in ARK1 and ARK2 cells detected by immunofluorescence. In both cell lines, Gal3 was found to be distributed in both the cytoplasm and the nucleus. C) Sanger sequence of ARK1 and ARK2 Gal3-KO cells. D) Immunoblotting of ARK1, ARK2 Gal3-CTRL and Gal3-KO cells.

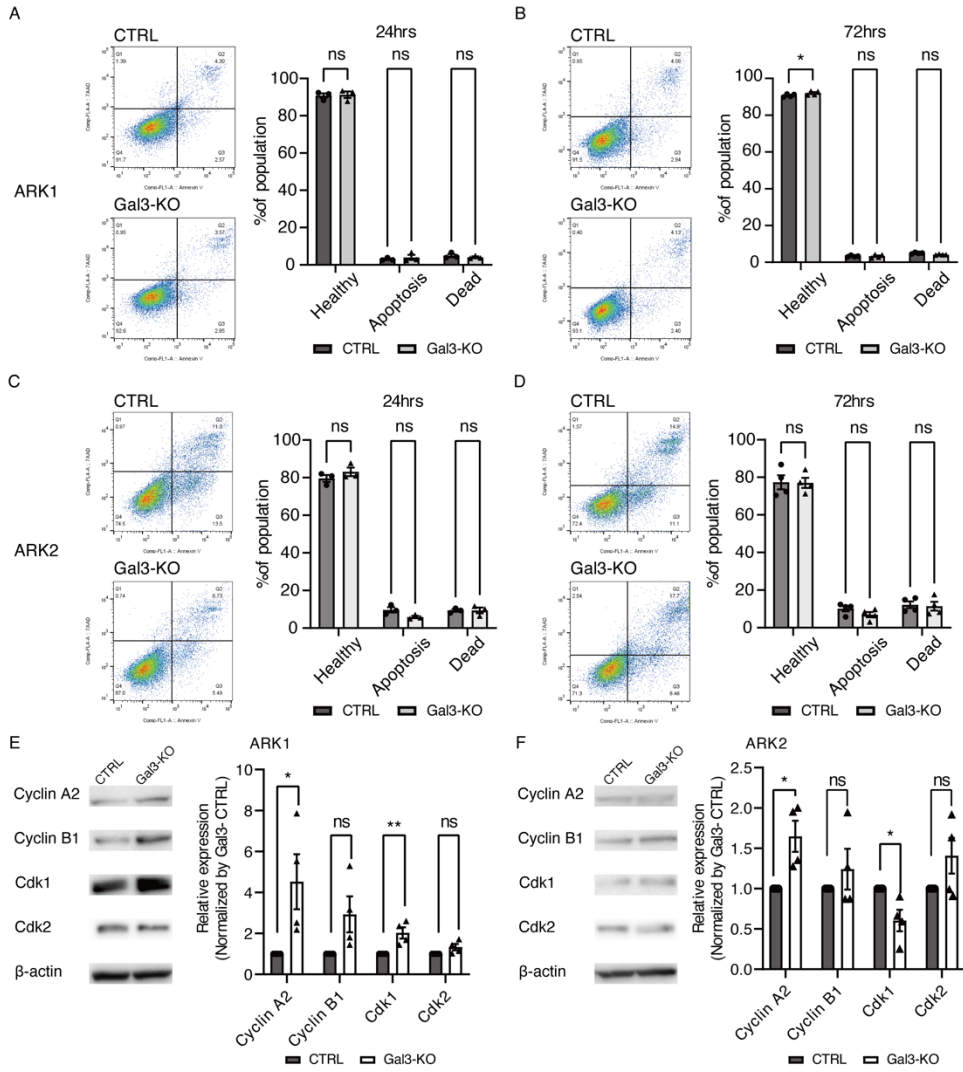

**Supplementary Fig. S3:** Effect of loss of Gal3 on cell viability baseline and cell cycle. A) Representative flow cytometry images and percentage of live/dead cells in ARK1 cells after 24 hours-incubation. B) Representative flow cytometry images and percentage of live/dead cells in ARK1 cells after 72 hours incubation. C) Representative flow cytometry images and percentage of live/dead cells in ARK2 cells after 24 hours-incubation. D) Representative flow cytometry images and percentage of live/dead cells in ARK2 cells after 72 hours incubation. E) Immunoblotting of cell cycle regulatory proteins representative of the G2/M phase in ARK1 cells. F) Immunoblotting results of cell cycle regulatory protein representative of the G2/M phase in ARK2 cells. Significance was calculated using t-test with \* indicating  $P < 0.05$ , and \*\* indicating  $P < 0.01$ .

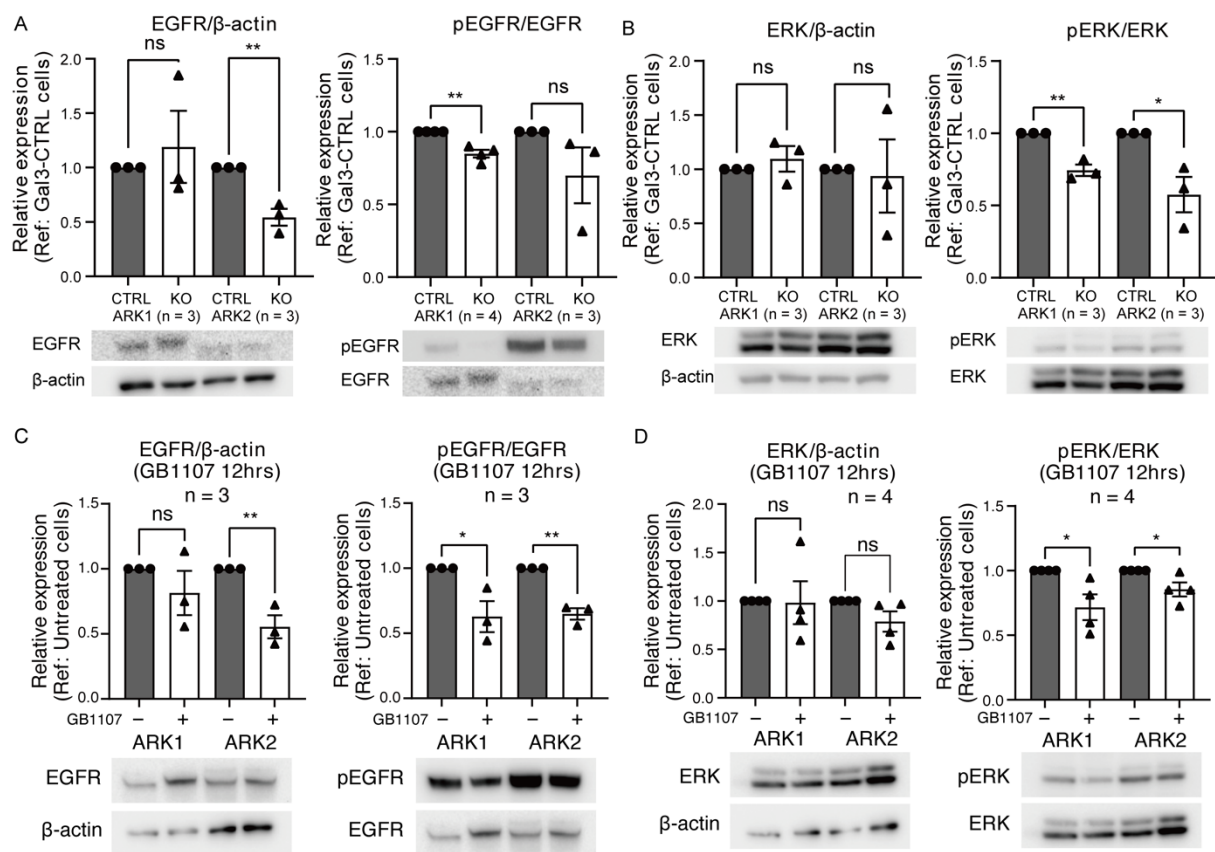

**Supplementary Fig. S4:** Baseline EGFR and ERK expression in Gal3-CTRL and Gal3-KO cells and acute effect of inhibition of Gal3 on EGFR and ERK expression. A) Immunoblot of EGFR and pEGFR. B) Immunoblot of ERK and pERK. C) Immunoblot of EGFR and pEGFR in lysates from ARK cell lines 12-hours post treatment with GB1107. D) Immunoblot of ERK and pERK in lysates from ARK cell lines 12-hours post treatment with GB1107. Significance was calculated using t-test with \* indicating  $P < 0.05$ , and \*\* indicating  $P < 0.01$ .

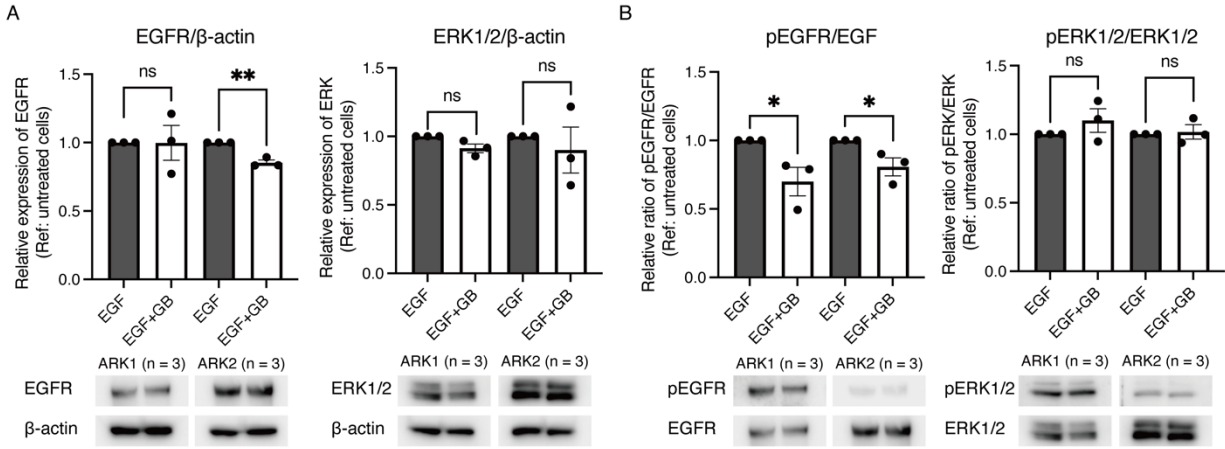

**Supplementary Fig. S5:** Acute effect of EGF + GB1107 administration on expression of EGFR and ERK and phosphorylation of EGFR and ERK1/2 in a serum free culture environment. A) Immunoblot of EGFR and ERK1/2 in ARK cell lines 30 minutes post treatment with EGF + vehicle or EGF + GB1107. B) Immunoblot of pEGFR and pERK in ARK cell lines 30 minutes post treatment with EGF + vehicle or EGF + GB1107. Significance was calculated using t-test with \* indicating  $P < 0.05$ , and \*\* indicating  $P < 0.01$ .

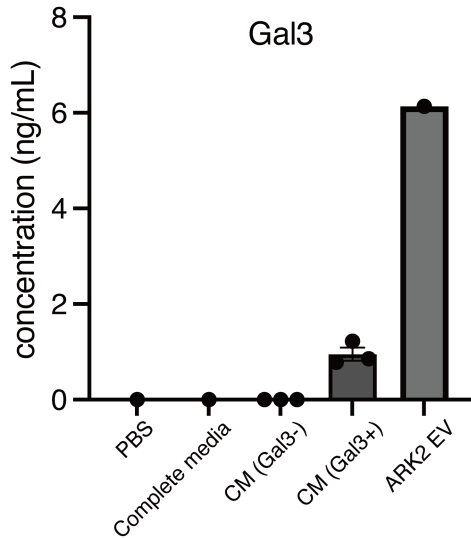

**Supplementary Fig. S6:** Gal3 concentration in conditioned media and extracellular vesicles isolated from ARK2 culture media as measured by ELISA.

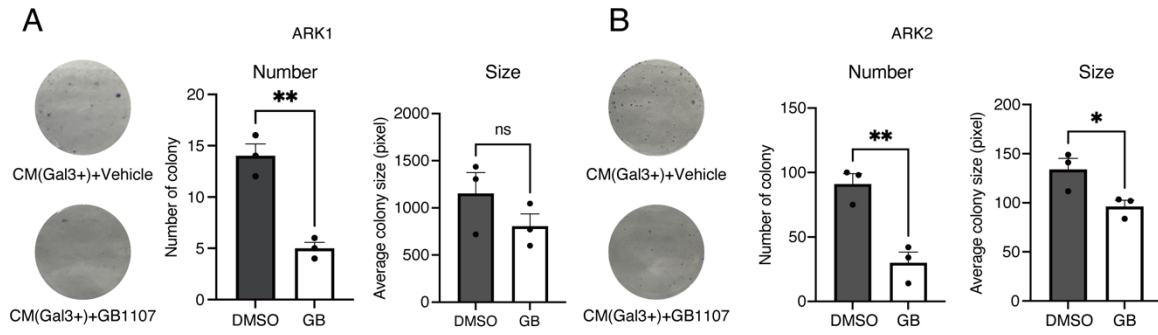

**Supplementary Fig. S7:** Determining if pharmacologic inhibition of Gal3 influences colony forming ability. A) Colony forming ability (Number and size of the colonies) of ARK1 Gal3-KO cells exposed to CM from ARK2 Gal3-CTRL + vehicle (DMSO) or GB1107 for 7 days. B) Colony forming ability (Number and size of the colonies) of ARK2 Gal3-KO cells exposed to CM from ARK2 Gal3-CTRL + vehicle (DMSO) or GB1107 for 7 days. t-test was employed with \* indicating  $P < 0.05$ , and \*\* indicating  $P < 0.01$ .

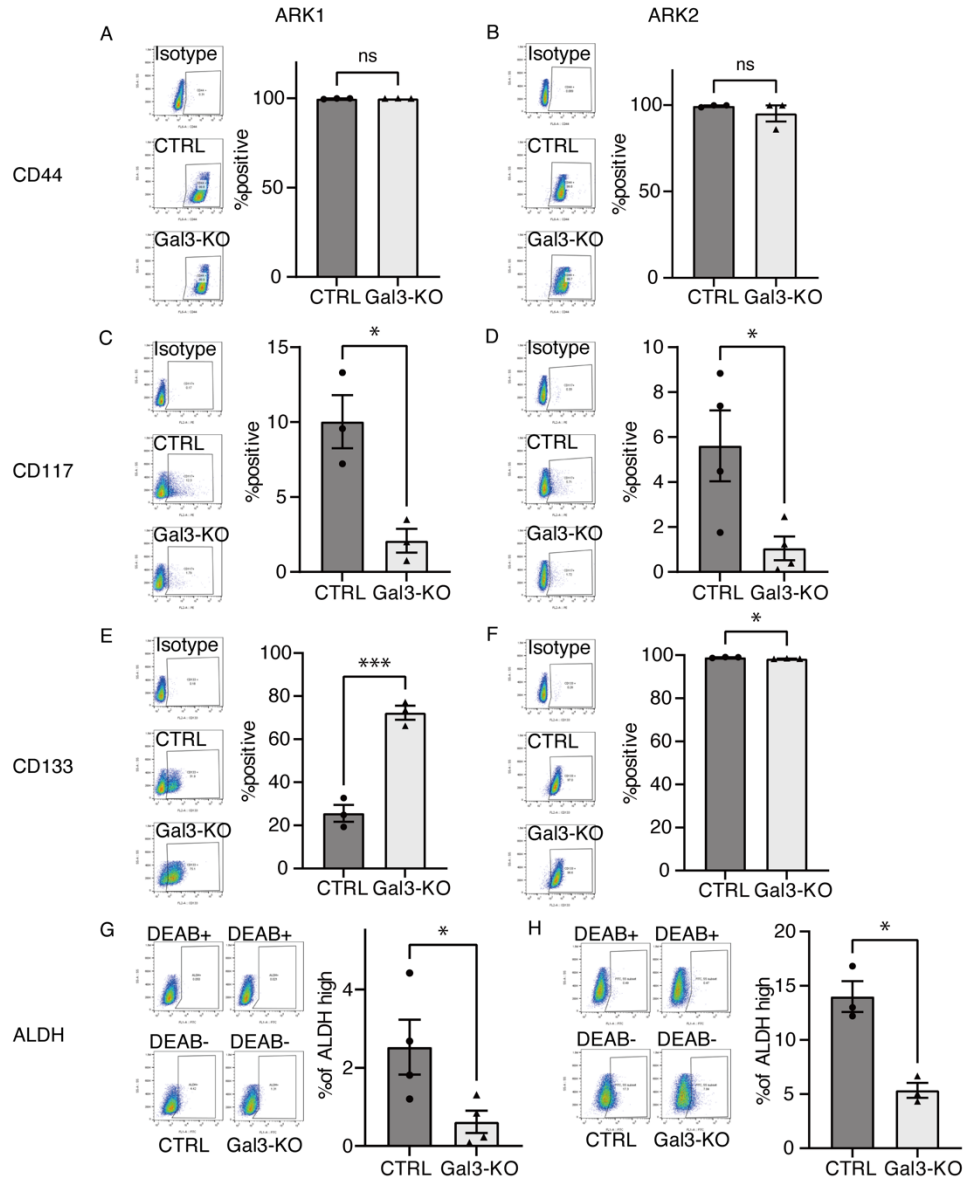

**Supplementary Fig. S8:** Expression of cancer stem markers. A) Percentage of CD44 positive cells in ARK1. B) Percentage of CD44 positive cells in ARK2. C) Percentage of CD117 positive cells in ARK1. D) Percentage of CD117 ARK2 positive cells. E) Percentage of CD133 positive cells in ARK1. F) Percentage of CD133 positive cells in ARK2. G) Percentage of ARK1 ALDH-activated cells. H) Percentage of ARK2 ALDH-activated cells. Significance was calculated using t-test with \* indicating  $P < 0.05$ , and \*\* indicating  $P < 0.01$ .





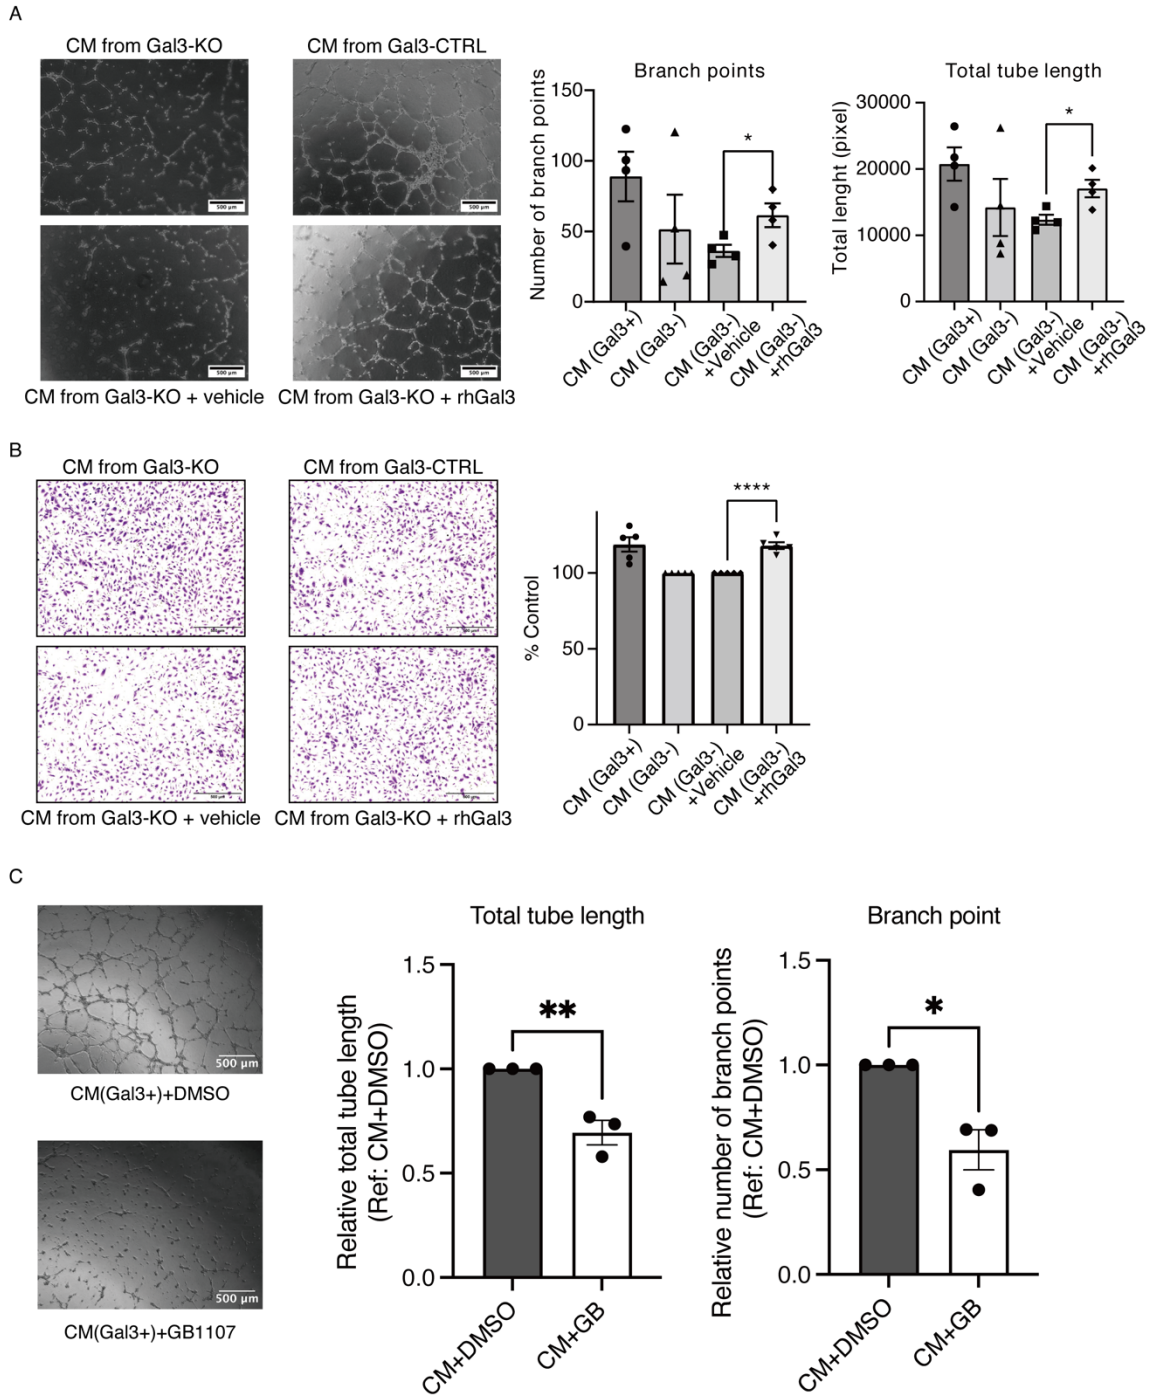

**Supplementary Fig. S11:** Assays related to the angiogenesis following the addition of CM, rhGal3, and/or Gal3-SMI. A) Tube forming assay on HUVECs following the addition of CM and rhGal3 or vehicle into Matrigel layer. B) Angiogenesis invasion assay on HUVECs following the addition of CM and rhGal3 or vehicle into culture media. C) Tube forming assay on HUVECs following the addition of CM and GB1107 or vehicle into Matrigel layer. Significance was calculated using t-test with \* indicating  $P < 0.05$ , \*\* indicating  $P < 0.01$ , \*\*\* indicating  $P < 0.001$ , and \*\*\*\* indicating  $P < 0.0001$ .

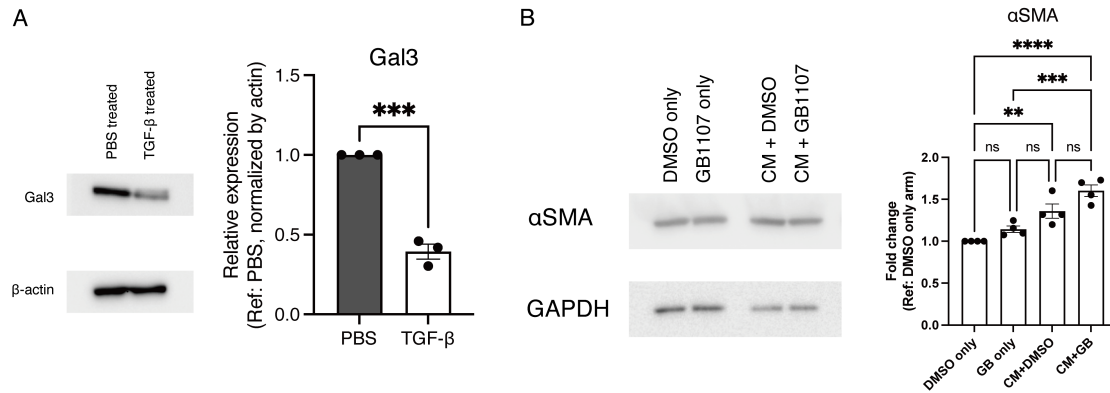

**Supplementary Fig. S12: Gal3 expression in fibroblasts and the effect of Gal3-SMI on  $\alpha$ SMA expression in fibroblasts.** A) Immunoblotting result for Gal3 in fibroblast exposed to PBS (vehicle) or TGF- $\beta$  for 48 hours. Significance was calculated using t-test with \*\*\* indicating  $P < 0.001$ . B)  $\alpha$ SMA expression in fibroblasts exposed to GB1107 or Gal3-positive CM + GB1107. No significant difference was obtained between DMSO only and GB1107 only arm and between CM+DMSO and CM+GB1107 arm. Significance was calculated using Tukey's multiple comparisons test with \*\* indicating  $P < 0.01$ , \*\*\* indicating  $P < 0.001$ , and \*\*\*\* indicating  $P < 0.0001$ .

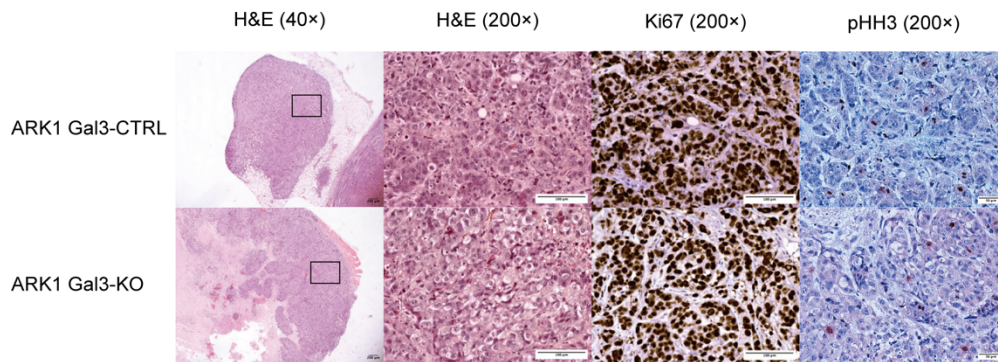

**Supplementary Fig. S13: H&E and IHC results for Ki67 and phospho-Histone H3 in tumor sections in the subcutaneous model.**

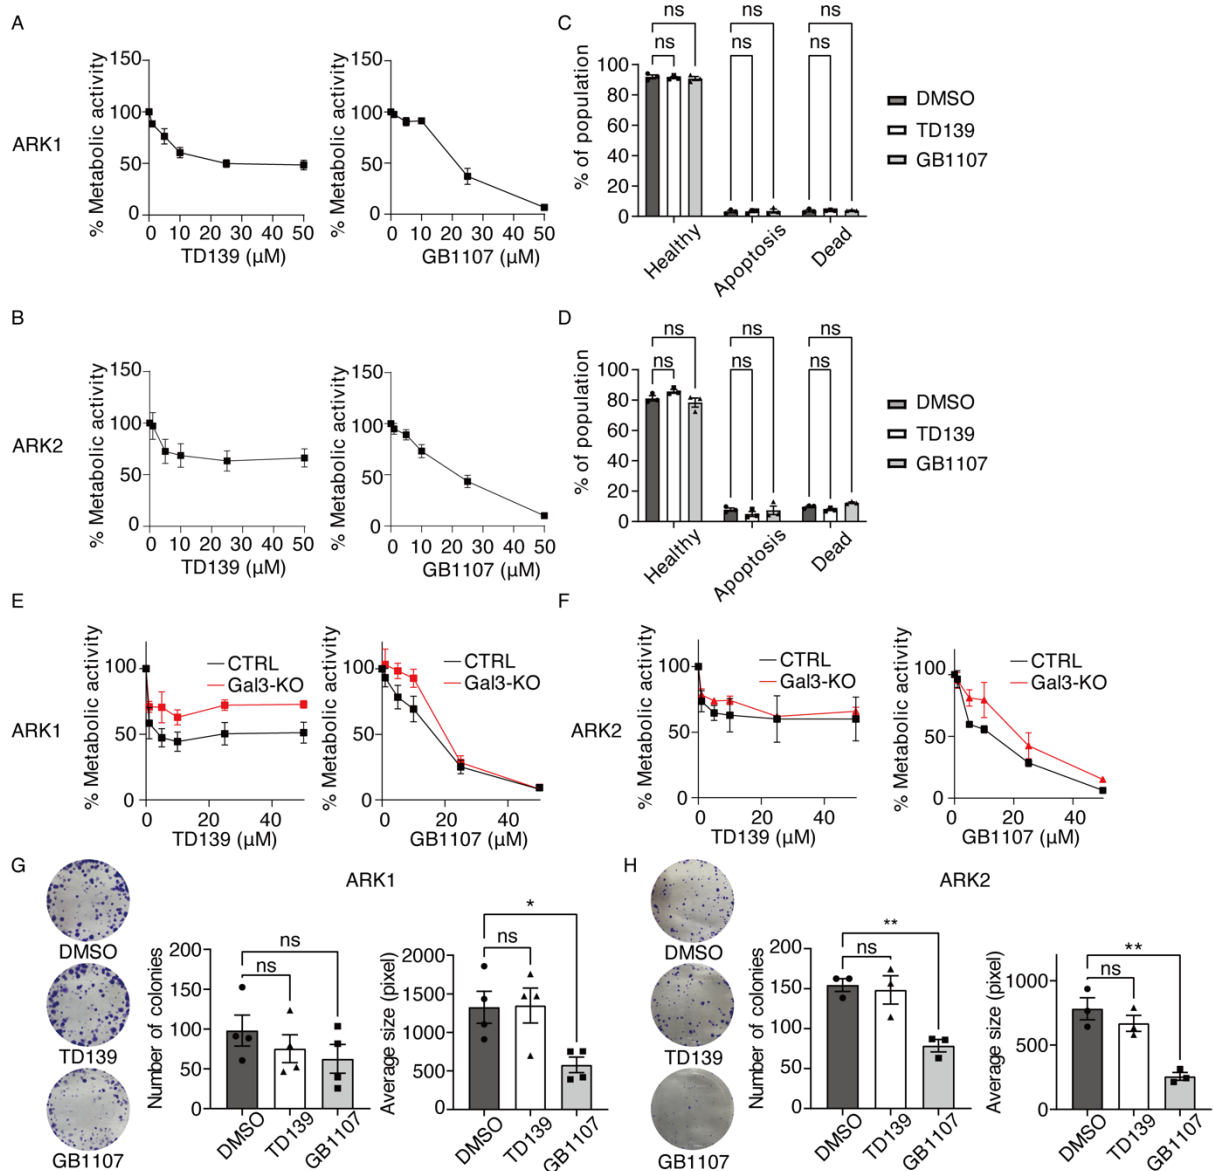

**Supplementary Fig. S14:** Testing Gal3-SMIs (TD139 and GB1107). A) MTT assay in ARK1 cells exposed with TD139/GB1107 for 72 hours. B) MTT assay in ARK2 cells exposed with TD139/GB1107 for 72 hours. C) Cell death analysis using flow cytometry in ARK1 cells exposed with TD139/GB1107. D) Cell death analysis using flow cytometry in ARK2 cells exposed with TD139/GB1107. E) MTT assay using TD139/GB1107 in ARK1 Gal3-CTRL and Gal3-KO cells to assess the off-target effects. F) MTT assay using TD139/GB1107 in ARK2 Gal3-CTRL and Gal3-KO cells to assess the off-target effects G) Colony forming assay in ARK1 cells exposed to the Gal3-SMIs. H) Colony forming assay in ARK2 cells exposed to Gal3-SMIs. Significance was calculated using Dunnett's test with \* indicating  $P < 0.05$ , \*\* indicating  $P < 0.01$ , \*\*\* indicating  $P < 0.001$ , and \*\*\*\* indicating  $P < 0.0001$ .

## **Supplementary Detailed Methodology**

Lists of abbreviations/antibodies/reagents/equipment/searched are provided separately.

### **To investigate the relationship between Gal3 expression and clinical features**

The Cancer Genome Atlas (TCGA) database analysis: The expression levels of LGALS3 and their correlation with progression-free survival (PFS) and overall survival (OS) were evaluated using the TCGA database through the website (<https://www.cbioportal.org/>). The TCGA Pan-cancer atlas was utilized as the database. Patients exhibiting LGALS3 expression z-scores  $>$  than 1 were categorized as belonging to the LGALS3 high group, while those with LGALS3 expression z-scores  $<$  than -1 were assigned to the LGALS3 low group. A comparison was made between the LGALS3 high and low groups for patients with endometrioid carcinoma and uterine serous cancer (USC), respectively.

Clinical samples: Paraffin blocks representing primary surgical cases whereby the patients had a diagnosis of uterine serous cancer were retrieved from either the Massachusetts General Hospital (MGH) Department of Pathology archives or from the Vincent Center for Reproductive Biology (VCRB)- MGH Gyn Repository. All samples were obtained under Institutional Review Board approved protocol (MGB022P003117 and DFHCC 07-049). Patient derived USC organoids were generated from samples originally obtained by the VCRB banking personnel after gaining informed under the approved protocol (DFHCC 07-049) or provided by Dr. Sarah Hill, Dana Farber Cancer Institute.

Evaluation of galectin 3 expression in primary tumors and its relationship to clinic-pathological features: All formalin-fixed paraffin-embedded (FFPE) tumor samples and their clinical correlate

information were collected under an approved IRB (MGB022P003117 and DFHCC 07-049). Formalin-fixed paraffin-embedded tissue representing the primary tumor of from each patient. All patients were confirmed to have uterine serous cancer. The FFPE blocks were sliced to a thickness of 5 $\mu$ m using a microtome, and glass slides were prepared. Tissue sections were subjected to hematoxylin and eosin (H&E) staining and Gal3 immunohistochemistry (IHC) using the same method described before(1). Anti-Gal3 goat polyclonal IgG (R&D Systems, Minneapolis, MN, USA, catalog number: AF1197, 1:100) was validated using Gal3 positive cells and Gal3 knockout (Gal3-KO) cell line (supplementary Fig. S1A-B). Two certified pathologists blinded to the original pathology report and diagnosis, scored Gal3 expression by the percentage of Gal3-positive tumor cells as previously reported(2). The clinical information collected included age at diagnosis, body mass index (BMI), stage, degree of myometrium invasion (<1/2 or  $\geq$ 1/2), lymphovascular space invasion (LVSI), cervical involvement, serosal invasion, presence of extrauterine lesions (ovarian, omentum, vaginal, parametrium, pelvic or para-aortic lymph nodes, other organs).

### **Cell lines and organoids culture**

Established human, USC cell lines were provided by Dr. A. Santin (Yale University, New Haven, CT, USA) and have been previously characterized (3, 4). ARK1 and ARK2 cells were cultured in the complete media; RPMI1640 medium (Life Technologies, Grand Island, NY, USA, catalog number: 11875093) supplemented with 10% fetal bovine serum (FBS) (Life Technologies, catalog number: 26140079) and 1% penicillin- streptomycin (Life Technologies, catalog number: 15140122). As previously described(1), we detected amplification of HER2 (ERBB2) in both cell lines and a PIK3CA mutation (E542K) in ARK1. SKOV3 cell, an ovarian

cancer cell line, was maintained as we described previously(5). Human umbilical vein endothelial cells (HUVECs) were purchased from LONZA (Lonza, Walkersville, MD, USA, catalog number: C2519A) and were maintained in EBM-2 medium (Lonza, catalog number: CC-3156) supplemented with Endothelial Cell Growth Medium 2 Supplement Pack (Lonza, catalog number: C-39211). IMR90 cells, normal fibroblast cells, were kindly provided by Dr. Cesar Castro (Massachusetts General Hospital, Boston, MA, USA). This cell line was maintained in Eagle's Minimum Essential Medium (EMEM) (ATCC, Manassas, VA, USA, catalog number: 30-2003) supplemented with 10% FBS and 1% penicillin-streptomycin. All cells were maintained at 37 °C at 5% CO<sub>2</sub>. The cell lines were confirmed negative for mycoplasma prior to any assay by the MycoAlert Mycoplasma Detection Kit (Lonza, catalog number: LT07-318).

The patient derived organoids were maintained as previously described(6).

### **Generation of Gal3-KO Cells and Knockdown Cells**

Oligonucleotides targeting LGALS3 were synthesized, annealed and ligated into the single guide RNA scaffold of the LentiCRISPRv2 (AddGene, Watertown, MA, USA, catalog number: 52961) via the BsmBI sites, according to the method previously described(7). Two different oligo pairs were chosen for construct synthesis targeting the following sequences in exon 3 (sgRNA1) or 4 (sgRNA2) of LGALS3: sgRNA1 GTCTACCCAGGGCCACCCAG and sgRNA2 GCTGATAACAATTCTGGGCA.

Successful construct generation was verified by Sanger sequencing of the sgRNA region.

Transfections of ARK1 and ARK2 lines were performed using Lipofectamine 2000 (Invitrogen, Carlsbad, CA, USA, catalog number: 11668019) with co-transfection of pLenti-C-mGFP-P2A-

Puro Lentiviral Gene Expression Vector (OriGene Technologies, Inc. Rockville, MD, USA, catalog number: PS100093) to detect the cells which were transfected. The GFP positive cells were isolated by flow cytometry (FACS Aria™ Fusion Flow Cytometer, BD Life Sciences, San Jose, CA, USA) and single cells were plated in individual well in 96 well plate. Lysates of individual CRISPR-Cas9-edited clones were evaluated by western blot for Gal3 expression. Biallelic knockout through indel generation was confirmed in each line following PCR amplification of genomic DNA extracted using DNeasy Blood & Tissue Kits (QIAGEN, Hilden, Germany, catalog number: 69506) with primers flanking the guide RNA target of the LGALS3 gene (For sgRNA1: forward; CTCAAGGATGGCCTGGCGCATG, reverse; GGTCTCCCTGAAGCCCTCTGCA. For sgRNA2: forward; GCCTTATCTCTTTGGCCCCTGGG, reverse; CCTGTTTGCATTGGGCTTCACCG). PCR products were sent to AZENTA for Sanger sequence (South Plainfield, NJ, USA). All primers were synthesized by IDT (Coralville, IA, USA). Gal-3 KO cells obtained using sgRNA1 in ARK1 and sgRNA2 in ARK2 and Gal3 control cells (Gal3-CTRL) generated using the same method without gRNA were used in subsequent experiments.

The SKOV3 Gal3 knockdown (Gal3-KD) cell line was generated utilizing the shRNA system and the materials and methodology previously described(8).

### **Conditioned Media (CM) for add back experiments.**

ARK2 Gal3-CTRL and ARK2 Gal3-KO cells were counted and plated at concentrations estimated to reach 70-80% confluence after three days. The day after plating, the complete media was changed out to media containing 10% or 2% FBS. After 48 hours, the conditioned medium

was collected and centrifuged at 3500 rpm for 5 minutes. The supernatant was filtered with a 0.2  $\mu\text{m}$  surfactant free cellulose acetate (SFCA) filter (Thermo Scientific, Carlsbad, CA, USA, catalog number: 09-740-105) and applied to the further experiments.

Extracellular vesicles (EVs) extraction: EVs were isolated from 10 ml of ARK2 culture media with sub-confluent condition on a 10 cm dish using Amicon® Ultra-15 Centrifugal Filter Unit (Millipore Sigma, Burlington, MA, USA, catalog number: UFC910024). Debris was excluded from the media by centrifugation and a 0.22  $\mu\text{m}$  sterile syringe filter system. Then, the EVs were isolated by centrifugation (at  $3,000 \times g$  for 30 min, rinsed with filtered DPBS, and spun at  $3,000 \times g$  for 30 min). All procedures were performed at 4°C. The concentrated EVs were diluted with lysis buffer and subjected to sonification and subjected to ELISA.

ELISA assay: Gal3 concentrations in conditioned media and EVs were measured using the Human Galectin-3 Quantikine ELISA Kit (R&D Systems, catalog number: DGAL30), following the manufacture's protocol.

### **To investigate the distribution of the Galectin 3**

Immunocytochemistry (ICC): Ten thousand cells of ARK1 and ARK2 were seeded on Falcon 4-well culture slides (Corning Inc., Kennebunk, ME, catalog number: 354114) in 300  $\mu\text{L}$  of complete media. After overnight incubation, the cells were fixed with 4% paraformaldehyde (PFA) (Biotium, Fremont, CA, USA, catalog number: 22023) at room temperature (RT) for 15 minutes. Subsequently, the cells were rinsed three times with PBS and permeabilized using 0.1% Triton X (Sigma-Aldrich, St. Louis, MO, USA, catalog number: X100), followed by another three rinses. The cells were then incubated with 3% bovine serum albumin (BSA) (Sigma-



Aldrich, catalog number: A3294) at RT for 1 hour. Primary antibodies, Anti-Gal3 goat polyclonal IgG (R&D Systems, catalog number: AF1197, 1:300) or Normal Goat IgG Control (R&D Systems, catalog number: AB-108-c), were added to the wells and incubated at RT for 1 hour. After three rinses with PBS and PBST, the cells were incubated with the appropriate secondary antibody, Donkey Anti-Goat IgG H&L (Alexa Fluor® 488) (Abcam, Cambridge, UK, catalog number: ab150129, 1:200), for 1 hour at RT in the dark. Following three rinses with PBS and PBST, the cells were stained with Phalloidin (Invitrogen, 1:400 Alexa Fluor™ 555 Phalloidin, catalog number: A34055) if required, at RT for 1 hour. The cells were then rinsed twice with PBS and mounted with DAPI (Vector Laboratories, Inc., Burlingame, CA, USA, catalog number: H-1200). Finally, the cells were observed and imaged under a 60x magnification using the FV3000 confocal laser scanning microscope (Olympus, Tokyo, Japan).

#### **Assessment of cell viability and proliferation.**

Cell counts:  $0.1 \times 10^6$  cells/well were seeded on the 6-well plates (Corning Inc., catalog number: 3516). Cell counts were determined with a TC20 Automated Cell Counter (Bio-Rad Inc, Hercules, CA, USA) at the indicated time points (time zero = O/N incubation, 24, 48, and 72 hours after O/N incubation) in triplicate. Dead cells were excluded using the trypan blue staining (Life Technologies, catalog number: 15250061).

Cell death assessment:  $0.1 \times 10^6$  cells (ARK1 and ARK2 CTL and Gal3-KO) were seeded per well on 6-well plates (Corning Inc., catalog number: 3516) in the complete media. After 24 and 72 hours, all cells (those that were attached and those in the supernatant) were collected and the baseline level of apoptosis and necrosis were assessed by FITC Annexin V Apoptosis Detection

Kit with 7-AAD (BioLegend, San Diego, CA., catalog number: 640922). At a minimum, twenty thousand cells per technical replicate was evaluated with a flow cytometer (Gallios Flow Cytometer, Beckman-Coulter, France). The results were analyzed using FlowJo™ v10.8 Software (BD Life Sciences).

MTT assay to measure the chemosensitivity: Cells were harvested at sub-confluency and plated in 96-well plates (Corning Inc., catalog number: 3596) at 1,000 cells per well in 100 µL of media per well. After overnight incubation, 150 µL of the complete media containing each concentration (0, 1, 2.5, 5, 10, 20 µM) of carboplatin (Sigma-Aldrich, St. Louis, MO, USA, catalog number: C2538-250MG) was added to each well. Cell viability was assessed by MTT assay 72 hours after adding the media, as previously described(9).

BH3 profiling: To ascertain the degree of involvement of galectin 3 in cell priming towards apoptosis, we conducted BH3 profiling as described previously(10).

Cell cycle assay: Cells were seeded at  $0.5 \times 10^6$  cells per well on the 6 well plate (Corning Inc., catalog number: 3516) and incubated overnight. The cells were rinsed with serum-free medium, and then incubated with serum-free media for 24 hours. After which, the media was removed and the complete media was replaced, and the plates were incubated for an additional 6 hours. The cells were trypsinized, collected and processed using the Cell Cycle Phase Determination Kit (Cayman Chemical Company, Ann Arbor, MI, USA, catalog number: 10009349) as per manufactures instructions and assessed by flow cytometry. At least 20,000 events for each end point measure were evaluated. The FlowJo™ v10.8 Software (BD Life Sciences) cell cycle analysis module (Dean-Jett-Fox model) was used to analyze the percentage of population for each of the subG1, G0/G1 phase, S phase, and G2/M phase.

### **Investigating the impact of loss/inhibition of Gal3 on EGFR signaling**

Wild type ARK1 and ARK2 cells were seeded and cultured in a complete media with 10% FBS. When cells reached sub confluence, the media was replaced with complete media containing vehicle (Dimethyl sulfoxide: DMSO) (Fisher Scientific Co, catalog number: D136-1) or 10  $\mu$ M of GB1107 (MedChemExpress, Monmouth Junction, NJ, USA, catalog number: HY-114409), a Gal3 small molecule inhibitor (SMI). The cells were then maintained in culture for 12 or 72 hours. Cell lysates were recovered and were utilized for immunoblot analysis.

Assessment of Gal3 on EGF/EGFR signaling: Wild type ARK1 and ARK2 cells were cultured in serum-depleted media for 6 hours. The cells were then treated with 20 ng/ml of EGF (Life Technologies, catalog number: PHG0311) + vehicle or 10  $\mu$ M of GB1107. After 30 minutes, cells were harvested in a lysate buffer, and immunoblotting was run for analysis of EGFR/pEGFR and ERK1/2/pERK1/2.

### **Assessment of cancer stem cell properties and cancer stem cell markers.**

Colony forming assay: Five hundred cells per well were seeded into 6-well plates (Corning Inc., catalog number: 3516) and the medium was replaced every two days (day 3, day 6). At the end of the culture period the cells were fixed with methanol and stained with 0.5% crystal violet (GFS chemicals, Columbus, OH, USA, catalog number: 31201). Images of each well were captured, and the average size of the colonies and the average number of colonies were determined by Fiji software version 2.3.0(11). To examine the add-back effect of Gal3, the colony-forming assay was also conducted by incorporating CM mixed with complete media in a 1:1 ratio instead of using complete media. To further support Gal3 contributes to colony forming

ability, 10  $\mu$ M of GB1107 or vehicle (DMSO) was added to the CM from ARK2 Gal3-CTRL cells and the colony-forming assay was conducted in ARK1 and ARK2 Gal3-KO cell lines as described above.

Sphere forming assay: Media for the sphere-forming assay included DMEM/F12 (Life Technologies, catalog number: 11330032), 1% Pen/Strep, 10 ng/mL of bFGF recombinant human protein (Life Technologies, catalog number: 13256-029), 20 ng/mL of EGF (Life Technologies, catalog number: PHG0311), and B27 (Life Technologies, catalog number: 17504044). Cells were collected and resuspended in sphere-forming media.  $4 \times 10^4$  cells (ARK1) or  $2 \times 10^4$  cells (ARK2) per well with 2 mL of the media were seeded in low attachment plates (Corning Inc., catalog number: CLS3473). Cells were cultured for 14 days adding 100  $\mu$ L of the media with growth factors every two days. After the 14-day-incubation, tumor spheres in the wells were imaged under 40 $\times$  magnification of EVOS M5000 Imaging System (Thermo Fisher Scientific, San Jose, CA, USA). The average number of the tumor spheres was calculated.

Evaluation of cancer stem cell markers: ARK1 and ARK2 Gal3-CTRL and Gal3-KO cells were collected under sub-confluent status (roughly 70 to 80%) to analyze the percent of cells displaying the cancer stem cell markers (CD44, CD117, CD133, and aldehyde dehydrogenase (ALDH) activity). For assessment of CD44, CD117, and CD133 populations in the control and Gal3-KO cells, the isotype cell lines were harvested, rinsed twice with the staining buffer (BioLegend, catalog number: 420201) and stained with anti-CD44 antibody conjugated with APC (BD Biosciences, catalog number: 559942, 2:100), anti-CD117 antibody conjugated with PE (BD Biosciences, catalog number: 555714, 5:100) or anti-CD133 antibody conjugated with PE (Miltenyi Biotec, Bergisch, Gladbach, Germany, catalog number: 130-113-748, 2:100) at 4 $^{\circ}$ C

for 30 minutes. The isotype control for CD44 (BioLegend, catalog number: 401210), CD117 (BioLegend, catalog number 400114), and CD133 (BioLegend, catalog number: 401208) were used as the negative controls. The cells were also stained with DAPI (BioLegend, catalog number: 422801) to distinguish between live dead cells. At least 20,000 live singlet cells per technical replicate were assessed by flow cytometry the results were analyzed using FlowJo™ v10.8 Software (BD Life Sciences). ALDH activity was evaluated by using the ALDEFLUOR Kit (StemCell Technologies, Durham, NC, catalog number: 01700) in accordance with manufacturer's instructions. Briefly, cells were harvested, washed, counted, and suspended in ALDEFLUOR buffer at  $1 \times 10^6$  cells/mL. Cells were divided into two aliquots and incubated with 1.5 mmol/L ALDEFLUOR substrate in the presence or absence of the ALDH inhibitor N,N-diethylaminobenzaldehyde (DEAB). Following a 45-minute incubation at 37°C, the endpoints were assessed via flow cytometer as described above.

Investigating the impact of Gal3 inhibition on Notch1 signaling: Wild type ARK1 and ARK2 cells were seeded and cultured in the organoid culture condition(6). Cells were cultured in the organoid culture media with 10  $\mu$ M of GB1107 or vehicle (DMSO) for 7 days changing media every other. After 7-days in culture, the cells were collected, and the lysates were utilized for immunoblot analysis.

### **Exploring the role of Gal3 in metastatic potential**

Fibronectin adhesion assay: The fibronectin-coated 96 well-plate was made by adding 80  $\mu$ L of fibronectin solution (1  $\mu$ g/mL, Sigma-Aldrich, catalog number: F0556-100UL) and incubating for 1 hour at RT. After removing the solution, wells were rinsed with PBS three times. Ten thousand of ARK1 and ARK2 Gal3-CTRL and Gal3-KO cells per well were seeded with 100  $\mu$ L

of the complete media and incubated for 1 hour at 37°C, 5% CO<sub>2</sub>. After incubation, wells were rinsed gently with PBS, and cells were fixed with methanol for 15 minutes at RT. Cells were then stained with crystal violet for 20 minutes at RT. After staining, the wells were washed with dH<sub>2</sub>O, and an image recorded of the areas at the center of each well using a EVOS M5000 Imaging System (Thermo Fisher Scientific) at 40× magnification. The number of adherent cells was counted by Fiji software version 2.3.0(11). To confirm if the pharmacologic inhibition has a similar effect as Gal3-KO in cell adhesion ability, wild type ARK1 and ARK2 cells were cultured in the media containing 10 μM of GB1107 or vehicle (DMSO) for 72 hours (changed media every other day). Then, cells were collected and submitted to the fibronectin adhesion assay, where DMSO or 10 μM of GB1107 were added to the media.

Trans-well migration assay: After a 24 hour-culture in non-serum containing medium, the cells were trypsinized and resuspended in serum-free medium. In each insert,  $1 \times 10^5$  cells of ARK1 cells in 200 μL of serum-free medium or  $0.5 \times 10^5$  cells of ARK2 were placed in the upper chamber (Corning Inc., catalog number: 353097) and 500 μL of the complete medium with 10% FBS was added to the lower chamber as a chemoattractant. Cells that migrated across the bottom membrane of the insert (Corning Inc., catalog number: 3470) were fixed with methanol and stained with crystal violet staining solution (GFS chemicals Columbus, catalog number: 31201) after 8 hours (ARK1) and 24 hours (ARK2) incubation. Four images were captured at distinct positions on each insert membrane using Nikon ECLIPSE Ni-U (Nikon, Tokyo, Japan) with a magnification of 40×. The Fiji software version 2.3.0 was employed to quantify the number of migrated cells(11). To confirm if the pharmacologic inhibition has a similar effect as Gal3-KO in cell migration ability, wild type ARK1 and ARK2 cells were cultured in the media containing 10 μM of GB1107 or vehicle (DMSO) for 72 hours (changed media every other day). Then, the

wild type ARK1 and ARK2 cells were collected and submitted to the transwell migration assay, where DMSO or 10  $\mu$ M of GB1107 were added to the media.

Invasion assay: Corning BioCoat Matrigel Invasion Chambers with 8.0  $\mu$ m PET membrane 24-well plates were used to determine Gal3 influence on tumor cell invasion (Corning Inc., catalog number: 354480). After 24 hour-culture with non-serum medium, the cells were trypsinized and resuspended in serum-free medium. In each insert,  $1 \times 10^5$  cells in 200  $\mu$ L of serum-free medium were placed in the upper chamber and 500  $\mu$ L of the complete medium with FBS was added to the lower chamber as a chemoattractant. Cells that invaded and migrated across the Matrigel™ layer were imaged and analyzed as described above. To confirm if the pharmacologic inhibition has a similar effect as Gal3-KO in cell invasion ability, wild type ARK1 and ARK2 cells were cultured in the media containing 10  $\mu$ M of GB1107 or vehicle (DMSO) for 72 hours (changed media every other day). Then, cells were collected and submitted to the Matrigel invasion assay, where DMSO or 10  $\mu$ M of GB1107 were added to the media.

### **Determining the impact of Gal3 positive and negative tumor cell condition medium on tumor microenvironment.**

Angiogenesis invasion assay using HUVECs: HUVECs were cultured as described above.

Biocoat Matrigel Invasion Chambers (Corning Inc., catalog number: 354480) with an 8.0- $\mu$ m pore polyester membrane were used. The Matrigel™ in each invasion chamber was primed with 200  $\mu$ L of CM from ARK2 Gal3-CTRL or CM from ARK2 Gal3-KO for 24 hours at 37°C in a 5% CO<sub>2</sub> incubator. Fifty thousand HUVECs were mixed in 200  $\mu$ L of endothelial basal culture medium with no growth supplement and plated on top of the primed Matrigel™ after the CM

was aspirated. Subsequently, 500  $\mu$ L of endothelial culture medium with growth medium supplement was placed in the lower reservoir below the invasion chamber as an attractant. The samples were incubated for 16 hours, cells that invaded and migrated across the Matrigel™ layer were imaged and analyzed as described above.

For the add-back experiment using recombinant human galectin 3 (rhGal3) (R&D Systems, catalog number: 1154-GA-050), 5  $\mu$ g/mL of rhGal3 diluted with PBS containing 0.1% BSA or PBS containing 0.1% BSA was applied to the insert with 200  $\mu$ L of 2% FBS CM from ARK2 Gal3-KO.

Tube-forming assay using HUVECs: HUVECs were cultured as described above. Forty-eight well plates (Thermo Fisher Scientific, catalog number: 150687) were used, and Cultrex with reduced growth factor (RGF) and basement membrane extract (BME) (R&D Systems, catalog number: 3536-005-02) mixed with CM from ARK2 Gal3-CTRL or ARK2 Gal3-KO (1:1 ratio) were plated in each experimental well. Fifty thousand HUVECs were seeded on top of the RGF BME and incubated at 37 °C, 5% CO<sub>2</sub> for 6 hours. Tubes were assessed at 6 hours across all conditions with the EVOS M5000 Imaging System (Thermo Fisher Scientific) and quantified with Wimasis image analysis software (<https://www.wimasis.com/en/WimTube>). Four representative images were taken per well under 40 $\times$  magnification. Total tube length and number of branch points were used as the endpoints.

For the add-back experiment using rhGal3 (R&D Systems, catalog number: 1154-GA-050), 5  $\mu$ g/mL of rhGal3 diluted with PBS containing 0.1% BSA or PBS containing 0.1% BSA was applied to the BME mixed with CM from Gal3-KO and run the same assay.



To further support the impact of Gal3 in tube forming, 10  $\mu$ M of GB1107 or vehicle (DMSO) was applied to the BME mixed with CM from ARK2 Gal3-CTRL cells and the tube forming assay was conducted as described above.

Assessment of Gal3 influence on the transition of fibroblasts to cancer associated fibroblast (CAFs): IMR90 cells were seeded on Falcon 4 well culture slide (Corning Inc., catalog number: 354114) with 10,000 cells per chamber for ICC or on a Falcon 6 cm dish (Corning Inc., catalog number 353002) with 150,000 cells per dish. After overnight incubation, cells were treated with a 1:1 mixture of the complete media described above and 10% CM (from ARK2 Gal3-CTRL or ARK2 Gal3-KO). After 48 hours of incubation, treated cells were either assessed via ICC or lysates were subjected to western blot. A positive control included cells treated with 10 ng/mL of Transforming Growth Factor- $\beta$ 1 (TGF- $\beta$ 1) (PeproTech, Rocky Hill, NJ, USA, catalog number: 100-21) and the negative controls was vehicle (PBS) alone. ICC was conducted using the same method described before. The Human/Mouse/Rat alpha-Smooth Muscle Actin Antibody (R&D Systems, catalog number: MAB1420) was employed as the primary antibody at a dilution of 1:100, while the same concentration of the Mouse IgG2A Isotype Control (R&D Systems, catalog number: MAB003) was utilized as the isotype control. The F(ab')<sub>2</sub>-Goat anti-Mouse IgG (H+L) Cross-Adsorbed Secondary Antibody (Invitrogen, catalog number: A-11017) was employed as the secondary antibody at a dilution of 1:1000. Phalloidin was not utilized in this assay.

After fibroblasts were found to be Gal3-positive, we exposed them to 10 ng/ml TGF- $\beta$ 1 for 48 hours which resulted in reduced Gal3 expression compared with those exposed with vehicle as evidenced by immunoblotting. We then investigated the impact of pharmacological inhibition of Gal3 in fibroblasts and any exogenous Gal3 in CM. To accomplish this, fibroblasts were cultured

in complete media with DMSO (vehicle) or 10  $\mu$ M GB1107, or 1:1 mixed media with Gal3-positive CM with DMSO (vehicle) or 10  $\mu$ M GB1107. After 48 hours the expression level of  $\alpha$ SMA was assessed by immunoblotting as the indicator of conversion to CAF phenotype.

### **Confirmation of loss of Gal3 effect using in vivo models and patient derived organoids**

Animal protocols: Animal procedures were approved by the Massachusetts General Hospital Institution Animal Care and Use Committee and were performed according to the National Institutes of Health (NIH) Guide for the Care and Use of Laboratory Animals (Protocol number: 2017N000236). Female NSG (NOD scid gamma) mouse, 6 – 8 weeks age, were obtained from Steele Laboratories at MGH. The number of mice used in our in vivo experiments was based on preliminary experiments conducted using these specific cell lines. The experiments did not require blinding and randomization.

In vivo limiting dilution tumorigenic assay: ARK1 Gal3-CTRL and Gal3-KO cells were collected, counted, aliquoted and resuspended in 1:1 PBS: Cultrex Basement Membrane Extract, Type 2 (R&D Systems, catalog number: 3532-010-02) (100  $\mu$ L of PBS: 100  $\mu$ L of Cultrex Basement Membrane Extract) solution. Then,  $1 \times 10^4$ ,  $5 \times 10^4$ ,  $1 \times 10^5$ , and  $2 \times 10^5$  cells were injected subcutaneously in the dorsal flank of each mouse using 27-gauge needle. Each dilution group had four mice. Mice were palpated for tumor every two days starting on day 3 post injection to determine time to onset. Once tumors were evident, the date was noted, and mice were weighed and palpated twice a week to monitor tumor growth. Mice were to be euthanized when the tumors reached >15 mm or if the mouse lost more than 15% bodyweight or appeared in distress as indicated by ruffled fur or hunched posture or difficulty moving around the cage.

Mice were euthanized in accordance with our IACUC protocol. After euthanizing the mice, tumors were collected, weighed and processed for further investigation.

Intraperitoneal tumor implantation model: The intraperitoneal (IP) orthotopic model was incorporated to better appreciate the impact of loss of Gal3 on tumor cell implantation, establishment, and potential growth of 1 million of ARK1 Gal3-CTRL or ARK1 Gal3-KO cells injected in a volume of 200  $\mu$ L PBS into the peritoneal cavity. Sixty days post injection the mice were euthanized. The peritoneal cavity was imaged to document intraperitoneal disseminated lesions, the lesions were harvested, and total tumor weight was determined.

H&E staining and IHC: Xenograft tumor samples were processed, embedded in paraffin and 5  $\mu$ m sections were prepared. Slides were subjected to H&E, and IHC for Ki67 and phospho-Histone H3 (pHH3). Ki67 (1:100, DAKO, Carpinteria, CA, USA, catalog number: M7240) immunostaining was performed as previously described(1). IHC for pHH3 (1:100, Cell Signaling Technology, Danvers, MA, USA, catalog number: 9701) was performed following the manufacturer's instructions. Simultaneously, staining without primary antibodies was performed (Supplementary Fig. S1C-D. Briefly, after antigen unmasking with 10 mM sodium citrate buffer and quenching the endogenous peroxidase with 3% hydrogen peroxide (Fisher Scientific Co, Pittsburgh, PA, USA, catalog number: H325) in dH<sub>2</sub>O, nonspecific background was blocked with 6% BSA in 0.1% PBS-T. Primary antibody was diluted in 6% BSA and incubated 1 hour at RT. After washes, sections were incubated with secondary antibody (anti-rabbit IgG conjugated with HRP, 1:50, Santa Cruz Biotechnology, Dallas, TX, USA, catalog number: sc-2357), washed and incubated with a DAB substrate (DAKO, catalog number: SK-4100) and counterstained with hematoxylin.

Confirmation of the effects of Galectin 3 small-molecule inhibitors: The impact of Gal3 small-molecule inhibitors (SMIs), specifically TD139 (Selleck Chemicals, Houston, TX, USA, catalog number: S0471) and GB1107, on cell viability was assessed through MTT and cell death analysis. MTT assay was performed using the previously described methodology, investigating the effects of TD139 and GB1107 at concentrations of 0, 1, 5, 10, 25, and 50  $\mu\text{M}$  for 72-hour incubation.

For cell death analysis, a concentration of 10  $\mu\text{M}$  of each Gal3-SMI was utilized, followed by a 72-hour incubation period and subsequent analysis same as described previously.

The off-target effects of these Gal3-SMIs were confirmed by conducting a similar MTT assay on both Gal3-CTRL and Gal3-KO cells of ARK1 and ARK2.

Colony formation assay was performed in the presence or absence of 10  $\mu\text{M}$  of each Gal3-SMI for 72 hours. The culture medium containing Gal3-SMIs was changed out every other day. The other procedure was same as described.

Investigation of Gal3 pharmaceutical inhibition effect using patient-derived organoids:

Organoids were cultivated on the 48-well plate (Corning Inc., catalog number: 3548) using the methodology explicated above. The organoids were seeded in Matrigel (Corning Inc., 356231) and subsequently cultured in the organoid culture medium, which contained 10  $\mu\text{M}$  of GB1107 or the vehicle (DMSO). The media was replenished every other day, and the entire area occupied by the organoids was quantified observed using an Incucyte Live Cell System and Incucyte's automated Organoid Software Analysis Module (Essen BioScience, Ann Arbor, MI, USA).

## **Immunoblot analysis**

Immunoblot analysis was performed as previously described(1). Antibodies directed against Galectin 3 (R&D Systems, catalog number: AF1197), Cyclin A2 (Cell Signaling Technology, catalog number: 4656), Cyclin B1 (Cell Signaling Technology, catalog number: 4138), Cdk1 (Cell Signaling Technology, catalog number: 9116), Cdk2 (Cell Signaling Technology, catalog number: 2546), Notch1 (Cell Signaling Technology, catalog number: 3608), HES1 (Cell Signaling Technology, catalog number: 11988), HEY1 (Proteintech, Rosemont, IL, USA, catalog number: 19929-1-AP),  $\alpha$ SMA (R&D Systems, catalog number: MAB1420), EGFR (Cell Signaling Technology, catalog number: 4267), phospho-EGFR (Cell Signaling Technology, catalog number: 3777), ERK (Cell Signaling Technology, catalog number: 4695), phospho-ERK (Cell Signaling Technology, catalog number: 9106), GAPDH (Cell Signaling Technology, catalog number: 5174), and  $\beta$ -actin (Cell Signaling Technology, catalog number: 8457) were used. The dilution for all primary antibodies was 1:1000 except for Galectin 3 (1:2000). After incubation with the primary antibody, blots were incubated with the corresponding secondary antibody at RT for 1 hour. Then blots were developed using a chemiluminescent detection reagent (ECL reagent. Prometheus ProSignal, Genesee Scientific, San Diego, CA, USA, catalog number: 20-301B or Clarity Max™ Western ECL Substrate: Bio Rad Inc, catalog number: 1705062). Each blot was stripped using Re-Blot Plus Strong Antibody Stripping Solution (Millipore Sigma, catalog number: 2504) when the same membrane was used to reprobe with another primary antibody. Images were acquired using Bio Rad Chemi Doc Imaging System (Bio-Rad Inc) and analyzed using Bio Rad Image Lab Software (ver.6.1.0) (Bio-Rad Inc).

## Data presentation and statistical analysis

All experiments were independently replicated at least three times. Data shown in graph format represent means  $\pm$  SEM of combined results from all experimental replicates, whereas representative histological photomicrographs are indicated where appropriate. Statistical analyses were done with GraphPad Prism version 9.3.1. T-test was used for experiments in which one outcome or multiple independent outcomes were obtained. One-way ANOVA (analysis of variance) was employed for the comparison among multiple groups, followed by post hoc analysis using the Dunnett's test. Two-way ANOVA was used for the experiments with multiple related outcomes, and group comparisons were performed using Šidák correction. The  $\chi$ -square test was employed to analyze the contingency table. All statistical analyses were two-sided test. A p-value  $< 0.05$  was considered statistically significant.

## References:

1. Groeneweg JW, Hernandez SF, Byron VF, DiGloria CM, Lopez H, Scialabba V, et al. Dual HER2 targeting impedes growth of HER2 gene-amplified uterine serous carcinoma xenografts. *Clin Cancer Res.* 2014;20(24):6517-28.
2. Sumana BS, Shashidhar S, and Shivarudrappa AS. Galectin-3 Immunohistochemical Expression in Thyroid Neoplasms. *J Clin Diagn Res.* 2015;9(11):Ec07-11.
3. English DP, Bellone S, Cocco E, Bortolomai I, Pecorelli S, Lopez S, et al. Oncogenic PIK3CA gene mutations and HER2/neu gene amplifications determine the sensitivity of uterine serous carcinoma cell lines to GDC-0980, a selective inhibitor of Class I PI3 kinase and mTOR kinase (TORC1/2). *Am J Obstet Gynecol.* 2013;209(5):465.e1-9.

4. English DP, Roque DM, Carrara L, Lopez S, Bellone S, Cocco E, et al. HER2/neu gene amplification determines the sensitivity of uterine serous carcinoma cell lines to AZD8055, a novel dual mTORC1/2 inhibitor. *Gynecol Oncol.* 2013;131(3):753-8.
5. Garrett LA, Growdon WB, Rueda BR, and Foster R. Influence of a novel histone deacetylase inhibitor panobinostat (LBH589) on the growth of ovarian cancer. *J Ovarian Res.* 2016;9(1):58.
6. Hill SJ, Decker B, Roberts EA, Horowitz NS, Muto MG, Worley MJ, Jr., et al. Prediction of DNA Repair Inhibitor Response in Short-Term Patient-Derived Ovarian Cancer Organoids. *Cancer Discov.* 2018;8(11):1404-21.
7. Sanjana NE, Shalem O, and Zhang F. Improved vectors and genome-wide libraries for CRISPR screening. *Nat Methods.* 2014;11(8):783-4.
8. Rao TD, Fernández-Tejada A, Axelrod A, Rosales N, Yan X, Thapi S, et al. Antibodies Against Specific MUC16 Glycosylation Sites Inhibit Ovarian Cancer Growth. *ACS Chem Biol.* 2017;12(8):2085-96.
9. van Meerloo J, Kaspers GJ, and Cloos J. Cell sensitivity assays: the MTT assay. *Methods Mol Biol.* 2011;731:237-45.
10. Fraser C, Ryan J, and Sarosiek K. BH3 Profiling: A Functional Assay to Measure Apoptotic Priming and Dependencies. *Methods Mol Biol.* 2019;1877:61-76.
11. Schindelin J, Arganda-Carreras I, Frise E, Kaynig V, Longair M, Pietzsch T, et al. Fiji: an open-source platform for biological-image analysis. *Nat Methods.* 2012;9(7):676-82.

## Abbreviations list

| Abbreviations | Full term                                                 |
|---------------|-----------------------------------------------------------|
| 7-AAD         | 7-aminoactinomycin D                                      |
| $\alpha$ SMA  | alpha smooth muscle actin                                 |
| ALDH          | Aldehyde dehydrogenases                                   |
| ANOVA         | Analysis of variance                                      |
| BCL-2         | B-cell-lymphoma-2                                         |
| BH3           | Bcl-2 homology domain 3                                   |
| BID           | BH3-interacting domain death agonist                      |
| BIM           | Bcl-2-interacting mediator of cell death                  |
| BSA           | Bovine Serum Albumin                                      |
| Cas9          | CRISPR-associated protein 9                               |
| CD117         | Cluster of Differentiation 117                            |
| CD133         | Cluster of Differentiation 133                            |
| CD44          | Cluster of Differentiation 44                             |
| CM            | Conditioned media                                         |
| CRDs          | Carbohydrate recognition domains                          |
| CRSPR         | Clustered regularly interspaced short palindromic repeats |
| CSCs          | Cancer stem cells                                         |
| DAB           | 3,3'-Diaminobenzidine                                     |
| DAPI          | 4',6-diamidino-2-phenylindole                             |
| DMSO          | Dimethyl sulfoxide                                        |
| EGF           | Epidermal growth factor                                   |
| EGFR          | Epidermal growth factor receptor                          |
| EMEM          | Eagle's Minimum Essential Medium                          |
| ERK1/2        | Extracellular signal-regulated kinase 1/2                 |
| FBS           | Fetal bovine serum                                        |
| FIGO          | International Federation of Gynecology and Obstetrics     |
| FITC          | Fluorescein isothiocyanate                                |
| Gal3          | Galectin 3                                                |
| Gal3-CTRL     | Gal3 control                                              |
| Gal3-KD       | Gal3 knockdown                                            |
| Gal3-KO       | Gal3 knockout                                             |
| H&E           | Hematoxylin and eosin                                     |
| HUVECs        | Human umbilical vein endothelial cells                    |
| ICC           | Immunocytochemistry                                       |
| IHC           | Immunohistochemistry                                      |
| IP            | Intraperitoneal                                           |
| LVSI          | lymphovascular space invasion                             |



|              |                                                              |
|--------------|--------------------------------------------------------------|
| MGH          | Massachusetts General Hospital                               |
| MTT          | 3-(4,5-Dimethylthiazol-2-yl)-2,5-diphenyltetrazolium bromide |
| MUC16        | Mucin 16                                                     |
| MW           | molecular weight                                             |
| NIH          | National Institutes of Health                                |
| NSG mice     | NOD.Cg-Prkdcscid Il2rgtm1 Wjl/SzJ mice                       |
| OS           | Overall survival                                             |
| PBS          | Phosphate buffered saline                                    |
| PFS          | Progression-free survival                                    |
| pHH3         | Phospho-Histone H3                                           |
| rhGal3       | recombinant human galectin 3                                 |
| RNA          | Ribonucleic acid                                             |
| RPMI         | Roswell Park Memorial Institute Medium                       |
| RT           | Room temperature                                             |
| SEM          | Standard error of the mean                                   |
| SFCA         | surfactant free cellulose acetate                            |
| sgRNA        | single guide RNA                                             |
| SMI          | Small-Molecule Inhibitor                                     |
| TCGA         | The Cancer Genome Atlas                                      |
| TGF- $\beta$ | Transforming growth factor beta                              |
| TME          | Tumor microenvironment                                       |
| USC          | Uterine serous carcinoma                                     |
| VCRB         | Vincent Center for Reproductive Biology                      |

---

**Antibodies list**

| Application                                              | Antigen                                                                          | Primary/Secondary                                             | Host    | mono/poly | Company                   | Address                    | Cat #                | dulation | Loading protein (µg/well) | ECL              | Note                                         |                                                   |
|----------------------------------------------------------|----------------------------------------------------------------------------------|---------------------------------------------------------------|---------|-----------|---------------------------|----------------------------|----------------------|----------|---------------------------|------------------|----------------------------------------------|---------------------------------------------------|
| WB                                                       | Human/Mouse/Rat Galectin-3 Antibody                                              | Primary                                                       | Goat    | poly      | R&D Systems               | Minneapolis, MN, USA       | AF1197               | 1:2000   | 15                        | normal           | 10% Gel                                      |                                                   |
|                                                          | Human/Mouse/Rat alpha -Smooth Muscle Actin Antibody                              | Primary                                                       | mouse   | mono      | R&D Systems               | Minneapolis, MN, USA       | MAB1420              | 1:1000   | 15                        | normal           | 10% Gel                                      |                                                   |
|                                                          | Cyclin A2 (BF683) Mouse mAb                                                      | Primary                                                       | mouse   | mono      | Cell Signaling Technology | Danvers, MA, USA           | 4656                 | 1:1000   | 15                        | high sensitivity | 10% Gel                                      |                                                   |
|                                                          | Cyclin B1 Antibody                                                               | Primary                                                       | rabbit  | poly      | Cell Signaling Technology | Danvers, MA, USA           | 4138                 | 1:1000   | 15                        | high sensitivity | 10% Gel                                      |                                                   |
|                                                          | cdc2 (POH1) Mouse mAb                                                            | Primary                                                       | mouse   | mono      | Cell Signaling Technology | Danvers, MA, USA           | 9116                 | 1:1000   | 15                        | normal           | 10% Gel                                      |                                                   |
|                                                          | CDK2 (78B2) Rabbit mAb                                                           | Primary                                                       | Rabbit  | mono      | Cell Signaling Technology | Danvers, MA, USA           | 2546                 | 1:1000   | 15                        | normal           | 10% Gel                                      |                                                   |
|                                                          | Notch1 (D1E11) XP® Rabbit mAb                                                    | Primary                                                       | Rabbit  | mono      | Cell Signaling Technology | Danvers, MA, USA           | 3608                 | 1:1000   | whole: 50<br>cleaved: 30  |                  | whole: high<br>cleaved: normal               | Whole Notch: 3-8% Gel<br>Cleaved Notch: 4-12% Gel |
|                                                          | HES1 (D6P2U) Rabbit mAb #11988                                                   | Primary                                                       | Rabbit  | mono      | Cell Signaling Technology | Danvers, MA, USA           | 11988                | 1:1000   | 30                        |                  | high sensitivity                             | 4-12% Gel                                         |
|                                                          | HEY1 Polyclonal antibody                                                         | Primary                                                       | Rabbit  | poly      | Proteintech               | Rosemont, IL, USA          | 19929-1-AP           | 1:1000   | 30                        |                  | high sensitivity                             | 4-12% Gel                                         |
|                                                          | EGF Receptor (D38B1) XP® Rabbit mAb                                              | Primary                                                       | Rabbit  | mono      | Cell Signaling Technology | Danvers, MA, USA           | 4267                 | 1:1000   | 20                        |                  | normal                                       | 4-12% Gel                                         |
|                                                          | Phospho-EGF Receptor (Tyr1068) (D7A5) XP® Rabbit mAb                             | Primary                                                       | Rabbit  | mono      | Cell Signaling Technology | Danvers, MA, USA           | 3777                 | 1:1000   | 20                        |                  | normal                                       | 4-12% Gel                                         |
|                                                          | p44/42 MAPK (Erk1/2) (I37F5) Rabbit mAb                                          | Primary                                                       | Rabbit  | mono      | Cell Signaling Technology | Danvers, MA, USA           | 4695                 | 1:1000   | 20                        |                  | normal                                       | 4-12% Gel                                         |
|                                                          | Phospho-p44/42 MAPK (Erk1/2) (Thr202/Tyr204) (E10) Mouse mAb                     | Primary                                                       | Rabbit  | mono      | Cell Signaling Technology | Danvers, MA, USA           | 9106                 | 1:1000   | 20                        |                  | normal                                       | 4-12% Gel                                         |
|                                                          | β-Actin (D6A8) Rabbit mAb                                                        | Primary                                                       | Rabbit  | mono      | Cell Signaling Technology | Danvers, MA, USA           | 8457                 | 1:1000   | Loading control           |                  | normal                                       | Loading control                                   |
|                                                          | GAPDH (D16H11) XP® Rabbit mAb                                                    | Primary                                                       | Rabbit  | mono      | Cell Signaling Technology | Danvers, MA, USA           | 5174                 | 1:1000   | Loading control           |                  | normal                                       | Loading control                                   |
|                                                          | Anti-mouse IgG, HRP-linked Antibody                                              | Secondary                                                     | Horse   |           | Cell Signaling Technology | Danvers, MA, USA           | 7076                 | 1:10000  | NA                        |                  | NA                                           |                                                   |
|                                                          | Anti-rabbit IgG, HRP-linked Antibody                                             | Secondary                                                     | Goat    |           | Cell Signaling Technology | Danvers, MA, USA           | 7074                 | 1:10000  | NA                        |                  | NA                                           |                                                   |
|                                                          | Goat IgG HRP-conjugated Antibody                                                 | Secondary                                                     | Donkey  |           | R&D Systems               | Minneapolis, MN, USA       | HAF109               | 1:5000   | NA                        |                  | NA                                           |                                                   |
|                                                          | ICC                                                                              | Human/Mouse/Rat Galectin-3 Antibody                           | Primary | Goat      | poly                      | R&D Systems                | Minneapolis, MN, USA | AF1197   | 1:300                     | NA               | NA                                           |                                                   |
|                                                          |                                                                                  | Normal Goat IgG Control                                       | Primary | Goat      | poly                      | R&D Systems                | Minneapolis, MN, USA | AB-108-c | see note                  | NA               | NA                                           | Apply same concentration as primary antibody      |
| Alexa Fluor™ 555 Phalloidin                              |                                                                                  | Primary                                                       | NA      | NA        | Invitrogen                | Carlsbad, CA, USA          | A34055               | 1:400    | NA                        | NA               |                                              |                                                   |
| Human/Mouse/Rat alpha -Smooth Muscle Actin Antibody      |                                                                                  | Primary                                                       | mouse   | mono      | R&D Systems               | Minneapolis, MN, USA       | MAB1420              | 1:100    | NA                        | NA               |                                              |                                                   |
| Mouse IgG2A Isotype Control                              |                                                                                  | Primary                                                       | mouse   | mono      | R&D Systems               | Minneapolis, MN, USA       | MAB003               | see note | NA                        | NA               | Apply same concentration as primary antibody |                                                   |
| Donkey Anti-Goat IgG H&L                                 |                                                                                  | Secondary                                                     | Donkey  |           | Abcam                     | Cambridge, UK              | ab150129             | 1:200    | NA                        | NA               | NA                                           | Alexa Fluor® 488                                  |
| IHC                                                      | F(ab') <sub>2</sub> -Goat anti-mouse IgG (H+L) Cross-Adsorbed Secondary Antibody | Secondary                                                     | Goat    |           | Invitrogen                | Carlsbad, CA, USA          | A-11017              | 1:1000   | NA                        | NA               | Alexa Fluor™ 488                             |                                                   |
|                                                          | monoclonal mouse anti-human Ki-67                                                | Primary                                                       | Mouse   | mono      | Dako                      | Glostrup, Denmark          | M7240                | 1:100    | NA                        | NA               | follow the kit protocol                      |                                                   |
|                                                          | Phospho-Histone H3 (Ser10) Antibody                                              | Primary                                                       | Rabbit  | poly      | Cell Signaling Technology | Danvers, MA, USA           | 9701                 | 1:100    | NA                        | NA               |                                              |                                                   |
|                                                          | β-Catenin (D10A8) XP® Rabbit mAb                                                 | Primary                                                       | Rabbit  | mono      | Cell Signaling Technology | Danvers, MA, USA           | 8480                 | 1:100    | NA                        | NA               |                                              |                                                   |
|                                                          | Rabbit IgG, polyclonal - Isotype Control                                         | Primary                                                       | Rabbit  | poly      | Abcam                     | Cambridge, UK              | ab37415              | see note | NA                        | NA               | Apply same concentration as primary antibody |                                                   |
|                                                          | Human/Mouse/Rat Galectin-3 Antibody                                              | Primary                                                       | Goat    | poly      | R&D Systems               | Minneapolis, MN, USA       | AF1197               | 1:100    | NA                        | NA               |                                              |                                                   |
|                                                          | Normal Goat IgG Control                                                          | Primary                                                       | Goat    | poly      | R&D Systems               | Minneapolis, MN, USA       | AB-108-c             | see note | NA                        | NA               | Apply same concentration as primary antibody |                                                   |
|                                                          | mouse anti-rabbit IgG-HRP                                                        | Secondary                                                     | mouse   |           | Santa Cruz Biotechnology  | Dallas, TX, USA            | sc-2357              | 1:50     | NA                        | NA               | NA                                           |                                                   |
|                                                          | Rabbit Anti-Goat IgG H&L (HRP)                                                   | Secondary                                                     | Rabbit  |           | Abcam                     | Cambridge, UK              | ab6741               | 1:1000   | NA                        | NA               | NA                                           |                                                   |
|                                                          | Flow                                                                             | Annexin V (FITC Annexin V Apoptosis Detection Kit with 7-AAD) | Primary | NA        | NA                        | BioLegend                  | San Diego, CA, USA   | 640922   | 1:100                     | NA               | NA                                           | conjugated with FITC                              |
| 7AAD (FITC Annexin V Apoptosis Detection Kit with 7-AAD) |                                                                                  | Primary                                                       | NA      | NA        | BioLegend                 | San Diego, CA, USA         | 640922               | 5:100    | NA                        | NA               |                                              |                                                   |
| BD Pharmingen™ APC Mouse Anti-Human CD44                 |                                                                                  | Primary                                                       | Mouse   | IgG2b k   | BD Biosciences            | San Jose, CA, USA          | 559942               | 2:100    | NA                        | NA               | conjugated with APC                          |                                                   |
| BD Pharmingen™ PE Mouse Anti-Human CD117                 |                                                                                  | Primary                                                       | Mouse   | IgG1 k    | BD Biosciences            | San Jose, CA, USA          | 555714               | 5:100    | NA                        | NA               | conjugated with PE                           |                                                   |
| CD133/2 Antibody, anti-human                             |                                                                                  | Primary                                                       | Mouse   | IgG2b k   | Miltenyi Biotec           | Bergisch Gladbach, Germany | 130-113-748          | 2:100    | NA                        | NA               | conjugated with PE                           |                                                   |
| ALDEFUOR™ Kit                                            |                                                                                  | NA                                                            | NA      | NA        | StemCell Technologies     | Durham, NC, USA            | 1700                 | see note | NA                        | NA               | Kit                                          |                                                   |
| Cell Cycle Phase Determination Kit                       |                                                                                  | NA                                                            | NA      | NA        | Cayman Chemical Company   | Ann Arbor, MI, USA         | 10009349             | see note | NA                        | NA               | Kit                                          |                                                   |
| APC Mouse IgG2b, κ Isotype Ctrl Antibody                 |                                                                                  | Primary                                                       | mouse   | IgG2b k   | BioLegend                 | San Diego, CA, USA         | 401210               | see note | NA                        | NA               | Apply same concentration as primary antibody |                                                   |
| PE Mouse IgG1, κ Isotype Ctrl (FC) Antibody              |                                                                                  | Primary                                                       | Mouse   | IgG1 k    | BioLegend                 | San Diego, CA, USA         | 400114               | see note | NA                        | NA               | Apply same concentration as primary antibody |                                                   |
| PE Mouse IgG2b, κ Isotype Ctrl Antibody                  |                                                                                  | Primary                                                       | mouse   | IgG2b k   | BioLegend                 | San Diego, CA, USA         | 401208               | see note | NA                        | NA               | Apply same concentration as primary antibody |                                                   |
| DAPI (4',6-Diamidino-2-Phenylindole, Dilactate)          |                                                                                  | NA                                                            | NA      | NA        | BioLegend                 | San Diego, CA, USA         | 422801               | 1:100    | NA                        | NA               | 1mg/ml                                       |                                                   |

**Reagent/equipment/website list**

| Reagent/equipment/website                                                            | Company                    | Address               | Catalog number | Apprication                      |
|--------------------------------------------------------------------------------------|----------------------------|-----------------------|----------------|----------------------------------|
| 6 cm dish                                                                            | Corning Inc.               | Kennebunk, ME, USA    | 353002         | cell culture                     |
| 10 cm dish                                                                           | Corning Inc.               | Kennebunk, ME, USA    | 351029         | cell culture                     |
| 6-well plate                                                                         | Corning Inc.               | Kennebunk, ME, USA,   | 3516           | cell culture                     |
| 12-well plate                                                                        | Life Technologies          | Grand Island, NY, USA | 150628         | cell culture                     |
| 24-well plate                                                                        | Corning Inc.               | Kennebunk, ME, USA    | 3524           | cell culture                     |
| 48-well plate                                                                        | Thermo Fisher Scientific   | San Jose, CA, USA     | 150687         | cell culture                     |
| 48-well plate (for organoids)                                                        | Corning Inc.               | Kennebunk, ME, USA    | 3548           | cell culture                     |
| 96-well plate                                                                        | Corning Inc.               | Kennebunk, ME, USA,   | 3596           | cell culture                     |
| Human umbilical vein endothelial cells                                               | Lonza                      | Walkersville, MD, USA | C2519A         | cell culture                     |
| EBM-2 medium                                                                         | Lonza                      | Walkersville, MD, USA | CC-3156        | cell culture                     |
| Endothelial Cell Growth Medium 2 Supplement Pack                                     | Lonza                      | Walkersville, MD, USA | C-39211        | cell culture                     |
| RPMI 1640 Medium                                                                     | Life Technologies          | Grand Island, NY, USA | 11875093       | cell culture (ARK1, ARK2, SKOV3) |
| Eagle's Minimum Essential Medium (EMEM)                                              | ATCC                       | Manassas, VA, USA     | 30-2003        | cell culture (IMR90)             |
| Fetal Bovine Serum, qualified                                                        | Life Technologies          | Grand Island, NY, USA | 26140-079      | cell culture (except HUVECs)     |
| penicillin- streptomycin                                                             | Life Technologies          | Grand Island, NY, USA | 15140122       | cell culture                     |
| PBS, pH 7.4                                                                          | Life Technologies          | Grand Island, NY, USA | 10010023       | cell culture                     |
| MycoAlert Mycoplasma Detection Kit                                                   | Lonza                      | Walkersville, MD, USA | LT07-318       | cell culture                     |
| Trypan Blue Solution, 0.4%                                                           | Life Technologies          | Grand Island, NY, USA | 15250061       | cell culture                     |
| Trypsin-EDTA (0.25%), phenol red                                                     | Life Technologies          | Grand Island, NY, USA | 25200056       | cell culture                     |
| Thermo Scientific™ Nalgene™ Sterile Syringe Filters                                  | Thermo Scientific          | Carlsbad, CA, USA     | 09-740-105     | conditioned medium               |
| Corning® Matrigel® Matrix, Phenol Red Free, Corning®, Matrigel Matrix GFR            | Corning Inc.               | Kennebunk, ME, USA    | 356231         | Organoid culture                 |
| GlutaMAX™ Supplement                                                                 | Life Technologies          | Grand Island, NY, USA | 35050061       | Organoid culture                 |
| HEPES (1M)                                                                           | Life Technologies          | Grand Island, NY, USA | 15630080       | Organoid culture                 |
| Recombinant Human R-Spondin-1                                                        | PeproTech                  | Rocky Hill, NJ, USA   | 120-38         | Organoid culture                 |
| Recombinant Human Noggin                                                             | PeproTech                  | Rocky Hill, NJ, USA   | 120-10C        | Organoid culture                 |
| Animal-Free Recombinant Human EGF                                                    | PeproTech                  | Rocky Hill, NJ, USA   | AF-100-15      | Organoid culture                 |
| Recombinant Human FGF-10                                                             | PeproTech                  | Rocky Hill, NJ, USA   | 100-26         | Organoid culture                 |
| Recombinant Human FGF-basic (154 a.a.)                                               | PeproTech                  | Rocky Hill, NJ, USA   | 100-18B        | Organoid culture                 |
| Nicotinamide,bioreagent, suitable for cell culture, suitable for insect cell culture | Sigma-Aldrich              | St. Louis, MO, USA    | N0636-100G     | Organoid culture                 |
| N-Acetyl-L-cysteine                                                                  | Sigma-Aldrich              | St. Louis, MO, USA    | A9165-5G       | Organoid culture                 |
| Prostaglandin E2                                                                     | Toctris Bioscience         | Bristol, UK           | 2296           | Organoid culture                 |
| Sb 202190 monohydrochloride hydrate                                                  | Sigma-Aldrich              | St. Louis, MO, USA    | S7076-25MG     | Organoid culture                 |
| A 83-01                                                                              | Sigma-Aldrich              | St. Louis, MO, USA    | SML0788        | Organoid culture                 |
| LB Agar, powder (Lennox L agar)                                                      | Life Technologies          | Grand Island, NY, USA | 22700025       | Plasmid                          |
| LB agar (MILLER)                                                                     | Sigma-Aldrich              | St. Louis, MO, USA    | 22700025       | Plasmid                          |
| One Shot™ TOP10 Chemically Competent E. coli                                         | Life Technologies          | Grand Island, NY, USA | C404010        | Plasmid                          |
| Ampicillin sodium salt                                                               | Sigma-Aldrich              | St. Louis, MO, USA    | A0166          | Plasmid                          |
| QIAwave Plasmid Miniprep Kit                                                         | Qiagen                     | Hilden, Germany       | 27104          | Plasmid                          |
| Opti-MEM™ I Reduced Serum Medium                                                     | Life Technologies          | Grand Island, NY, USA | 31985062       | Gene editing                     |
| Polybrene                                                                            | American Bioanalytical     | Natick, MA, USA       | AB01643        | Gene editing                     |
| LentiCRISPRv2                                                                        | AddGene                    | Watertown, MA, USA    | 52961          | Gene editing                     |
| pLenti-C-mGFP-P2A-Puro Lentiviral Gene Expression Vector                             | OriGene Technologies, Inc. | Rockville, MD, USA    | PS100093       | Gene editing                     |
| Lipofectamine 2000                                                                   | Invitrogen                 | Carlsbad, CA, USA     | 11668019       | Gene editing                     |
| DNeasy Blood & Tissue Kit                                                            | Qiagen                     | Hilden, Germany       | 69504          | Gene editing                     |
| Falcon® 4-well Culture Slide                                                         | Corning Inc.               | Kennebunk, ME, USA    | 354114         | ICC                              |
| Paraformaldehyde, 4% in PBS                                                          | Biotium                    | Fremont, CA, USA      | 22023          | ICC                              |
| Triton™ X-100                                                                        | Sigma-Aldrich              | St. Louis, MO, USA    | X100           | ICC                              |
| VECTASHIELD® Antifade Mounting Medium with DAPI                                      | Vector Laboratories, Inc   | Burlingame, CA, USA   | H-1200         | ICC                              |
| Fisherbrand™ Superfrost™ Plus Microscope Slides                                      | Fisher Scientific Co       | Pittsburgh, PA, USA   | 1255015        | IHC                              |
| Tomo® adhesion slides, clipped corners                                               | Matsunami Glass            | Osaka, Japan          | TOM-14         | IHC                              |
| Citrate Buffer, pH 6.0, 10×, Antigen Retriever                                       | Sigma-Aldrich              | St. Louis, MO, USA    | C9999          | IHC                              |
| Hydrogen Peroxide                                                                    | Fisher Scientific Co       | Pittsburgh, PA, USA   | H325           | IHC                              |
| M.O.M.® (Mouse on Mouse ) Elite® Immunodetection Kit, Peroxidase                     | Vector Laboratories, Inc   | Burlingame, CA, USA   | PK-2200        | IHC                              |
| DAB Substrate Kit, Peroxidase (HRP)                                                  | Dako                       | Glostrup, Denmark     | SK-4100        | IHC                              |
| Fisherbrand™ Cover Glasses: Rectangles                                               | Fisher Scientific Co       | Pittsburgh, PA, USA   | 12545K         | ICC/IHC                          |

|                                                                                         |                           |                                                                                                                                                                                                                                 |             |                                       |
|-----------------------------------------------------------------------------------------|---------------------------|---------------------------------------------------------------------------------------------------------------------------------------------------------------------------------------------------------------------------------|-------------|---------------------------------------|
| Bovine serum albumin                                                                    | Sigma-Aldrich             | St. Louis, MO, USA                                                                                                                                                                                                              | A3294       | ICC/IHC                               |
| Human Galectin-3 Quantikine ELISA Kit                                                   | R&D Systems               | Minneapolis, MN, USA                                                                                                                                                                                                            | DGAL30      | ELISA                                 |
| Amicon® Ultra-15 Centrifugal Filter Unit                                                | Millipore Sigma           | Burlington, MA, USA                                                                                                                                                                                                             | UFC910024   | EV isolation                          |
| Cell Staining Buffer                                                                    | BioLegend                 | San Diego, CA, USA                                                                                                                                                                                                              | 420201      | Flow cytometer                        |
| carboplatin                                                                             | Sigma-Aldrich             | St. Louis, MO, USA                                                                                                                                                                                                              | C2538-250MG | MTT                                   |
| RPMI 1640 Medium, no phenol red                                                         | Invitrogen                | Carlsbad, CA, USA                                                                                                                                                                                                               | 11835030    | MTT                                   |
| MTT (3-(4,5-Dimethylthiazol-2-yl)-2,5-Diphenyltetrazolium Bromide)                      | Invitrogen                | Carlsbad, CA, USA                                                                                                                                                                                                               | M6494       | MTT                                   |
| Human EGF Recombinant Protein                                                           | Life Technologies         | Grand Island, NY, USA                                                                                                                                                                                                           | PHG0311     | EGFR signaling                        |
| crystal violet                                                                          | GFS chemicals             | Columbus, OH, USA                                                                                                                                                                                                               | 31201       | Colony, Adhesion, Migration, Invasion |
| Costar® 6-well Clear Flat Bottom Ultra-Low Attachment Multiple Well Plates              | Corning Inc.              | Kennebunk, ME, USA                                                                                                                                                                                                              | 3471        | Sphere-forming                        |
| Advanced DMEM/F-12                                                                      | Life Technologies         | Grand Island, NY, USA                                                                                                                                                                                                           | 12634010    | Sphere-forming                        |
| Human FGF-basic (FGF-2/bFGF) Recombinant Protein                                        | Life Technologies         | Grand Island, NY, USA                                                                                                                                                                                                           | 13256-029   | Sphere-forming                        |
| Human EGF Recombinant Protein                                                           | Life Technologies         | Grand Island, NY, USA                                                                                                                                                                                                           | PHG0311     | Sphere-forming                        |
| B-27 supplement (50x) without vitamin A                                                 | Life Technologies         | Grand Island, NY, USA                                                                                                                                                                                                           | 12587-010   | Sphere-forming                        |
| Fibronectin solution human fibroblasts                                                  | Sigma-Aldrich             | St. Louis, MO, USA                                                                                                                                                                                                              | F0556-100UL | Fibronectin adhesion                  |
| Falcon® Permeable Support for 24-well Plate with 8.0 µm Transparent PET Membrane        | Corning Inc.              | Kennebunk, ME, USA                                                                                                                                                                                                              | 353097      | Migration                             |
| Falcon® 24-well TC-treated Cell Polystyrene Permeable Support Companion Plate, with Lid | Corning Inc.              | Kennebunk, ME, USA                                                                                                                                                                                                              | 353504      | Migration                             |
| Biocoat Matrigel Invasion Chambers                                                      | Corning Inc.              | Kennebunk, ME, USA                                                                                                                                                                                                              | 354480      | Invasion                              |
| Cultrex with reduced growth factor (RGF) and basement membrane extract                  | R&D Systems               | Minneapolis, MN, USA                                                                                                                                                                                                            | 3536-005-02 | Tube-forming                          |
| Recombinant Human Galectin-3 Protein                                                    | R&D Systems               | Minneapolis, MN, USA                                                                                                                                                                                                            | 1154-GA     | Angiogenesis invasion, Tube-forming   |
| Transforming Growth Factor-β1 (TGF-β1)                                                  | PeproTech                 | Rocky Hill, NJ, USA                                                                                                                                                                                                             | 100-21      | CAFs                                  |
| Cultrex Basement Membrane Extract, Type 2                                               | R&D Systems               | Minneapolis, MN, USA                                                                                                                                                                                                            | 3532-010-02 | In vivo                               |
| UltraPure™ DNase/RNase-Free Distilled Water                                             | Life Technologies         | Grand Island, NY, USA                                                                                                                                                                                                           | 10977015    |                                       |
| Dimethyl Sulfoxide                                                                      | Fisher Scientific Co      | Pittsburgh, PA, USA                                                                                                                                                                                                             | D136-1      |                                       |
| TD139                                                                                   | Selleck Chemicals         | Houston, TX, USA                                                                                                                                                                                                                | S0471       |                                       |
| GB1107                                                                                  | MedChemExpress            | Monmouth Junction, NJ, USA                                                                                                                                                                                                      | HY-114409   | Organoid                              |
| RIPA Buffer (10X)                                                                       | Cell Signaling Technology | Danvers, MA, USA                                                                                                                                                                                                                | 9806        | Immunoblot                            |
| protein kinase inhibitor                                                                | Santa Cruz Biotechnology  | Dallas, TX, USA                                                                                                                                                                                                                 | sc-213277   | Immunoblot                            |
| Protease Inhibitor Cocktail                                                             | Sigma-Aldrich             | St. Louis, MO, USA                                                                                                                                                                                                              | P8340       | Immunoblot                            |
| Phosphatase Inhibitor Cocktail 3                                                        | Sigma-Aldrich             | St. Louis, MO, USA                                                                                                                                                                                                              | P0044       | Immunoblot                            |
| Protein Assay Reagent A                                                                 | Bio-Rad Inc               | Hercules, CA, USA                                                                                                                                                                                                               | 5000113     | Immunoblot                            |
| Protein Assay Reagent B                                                                 | Bio-Rad Inc               | Hercules, CA, USA                                                                                                                                                                                                               | 5000114     | Immunoblot                            |
| Protein Assay Reagent S                                                                 | Bio-Rad Inc               | Hercules, CA, USA                                                                                                                                                                                                               | 5000115     | Immunoblot                            |
| NuPAGE™ LDS Sample Buffer (4X)                                                          | Life Technologies         | Grand Island, NY, USA                                                                                                                                                                                                           | NP0007      | Immunoblot                            |
| NuPAGE™ Sample Reducing Agent (10X)                                                     | Life Technologies         | Grand Island, NY, USA                                                                                                                                                                                                           | NP0009      | Immunoblot                            |
| NuPAGE™ 3 to 8%, Tris-Acetate, 1.5 mm, Mini Protein Gels                                | Life Technologies         | Grand Island, NY, USA                                                                                                                                                                                                           | EA03785BOX  | Immunoblot                            |
| NuPAGE™ 4 to 12%, Bis-Tris, 1.5 mm, Mini Protein Gels                                   | Life Technologies         | Grand Island, NY, USA                                                                                                                                                                                                           | NP0336BOX   | Immunoblot                            |
| NuPAGE™ 10%, Bis-Tris, 1.5 mm, Mini Protein Gels                                        | Life Technologies         | Grand Island, NY, USA                                                                                                                                                                                                           | NP0316BOX   | Immunoblot                            |
| SeeBlue™ Plus2 Pre-stained Protein Standard                                             | Life Technologies         | Grand Island, NY, USA                                                                                                                                                                                                           | LC5925      | Immunoblot                            |
| HiMark™ Pre-stained Protein Standard                                                    | Life Technologies         | Grand Island, NY, USA                                                                                                                                                                                                           | LC5699      | Immunoblot                            |
| Bolt™ Antioxidant                                                                       | Life Technologies         | Grand Island, NY, USA                                                                                                                                                                                                           | BT0005      | Immunoblot                            |
| NuPAGE™ Tris-Acetate SDS Running Buffer (20X)                                           | Life Technologies         | Grand Island, NY, USA                                                                                                                                                                                                           | LA0041      | Immunoblot                            |
| NuPAGE™ MOPS SDS Running Buffer (20X)                                                   | Life Technologies         | Grand Island, NY, USA                                                                                                                                                                                                           | NP0001      | Immunoblot                            |
| Bolt™ Transfer Buffer (20X)                                                             | Life Technologies         | Grand Island, NY, USA                                                                                                                                                                                                           | BT00061     | Immunoblot                            |
| Blotting-Grade Blocker                                                                  | Bio-Rad Inc               | Hercules, CA, USA                                                                                                                                                                                                               | 1706404     | Immunoblot                            |
| Tris Buffered Saline (20X, for Western Blot Washing)                                    | Boston BioProducts        | Ashland, MA, USA                                                                                                                                                                                                                | BM-301X     | Immunoblot                            |
| Tween 20, Fisher BioReagents                                                            | Fisher Scientific Co      | Pittsburgh, PA, USA                                                                                                                                                                                                             | BP337-500   | Immunoblot                            |
| Ponceau S Solution                                                                      | Boston BioProducts        | Ashland, MA, USA                                                                                                                                                                                                                | ST-180      | Immunoblot                            |
| Prometheus Protein Biology Products 20-300B ProSignal® Pico ECL Reagent                 | Genesee Scientific        | San Diego, CA, USA                                                                                                                                                                                                              | 20-300B     | Immunoblot                            |
| Clarity Max™ Western ECL Substrate                                                      | Bio-Rad Inc               | Hercules, CA, USA                                                                                                                                                                                                               | 1705062     | Immunoblot                            |
| ReBlot Plus 10X Strong Antibody stripping solution                                      | Millipore                 | Germany                                                                                                                                                                                                                         | 2504        | Immunoblot                            |
| TCGA database                                                                           |                           | <a href="https://www.cbioportal.org/">https://www.cbioportal.org/</a>                                                                                                                                                           |             |                                       |
| AZENTA                                                                                  |                           | <a href="https://clims4.genewiz.com/RegisterAccount/Login?returnUrl=https://clims4.genewiz.com/CustomerHome/Index">https://clims4.genewiz.com/RegisterAccount/Login?returnUrl=https://clims4.genewiz.com/CustomerHome/Index</a> |             |                                       |
| Wimasis image analysis software                                                         |                           | <a href="https://www.wimasis.com/en/WimTube">https://www.wimasis.com/en/WimTube</a>                                                                                                                                             |             | Tube-forming                          |
| TC20 Automated Cell Counter                                                             | Bio-Rad Inc               | Hercules, CA, USA                                                                                                                                                                                                               |             | Cell count                            |
| EVOS M5000 Imaging System                                                               | Thermo Fisher Scientific  | San Jose, CA, USA                                                                                                                                                                                                               |             | Adhesion, Tube-forming                |
| Nikon ECLIPSE Ni-U                                                                      | Nikon                     | Tokyo, Japan                                                                                                                                                                                                                    |             | Migration, Invasion, IHC              |
| Nikon Eclipse TE2000-S microscope                                                       | Nikon                     | Tokyo, Japan                                                                                                                                                                                                                    |             | ICC                                   |

|                                                                               |                   |                    |                     |
|-------------------------------------------------------------------------------|-------------------|--------------------|---------------------|
| FV3000 confocal laser scanning microscope                                     | Olympus           | Tokyo, Japan       | ICC                 |
| FACSAria™ Fusion Flow Cytometer                                               | BD Life Sciences  | San Jose, CA, USA  | Single cell sorting |
| Gallios Flow Cytometer (10 colors/3 lasers)                                   | Beckman-Coulter   | Brea, CA, USA      | Flow cytometer      |
| Bio Rad Chemi Doc Imaging System                                              | Bio-Rad Inc       | Hercules, CA, USA  | WB                  |
| Incucyte Live Cell System and the automated Organoid Software Analysis Module | Essen BioScience  | Ann Arbor, MI, USA | Organoid            |
| FlowJo™ v10.8 Software                                                        | BD Life Sciences  | San Jose, CA, USA  | Flow cytometer      |
| Bio Rad Image Lab Software ver.6.1.0                                          | Bio-Rad Inc       | Hercules, CA, USA  | WB                  |
| GraphPad Prism version 9.3.1 for Windows                                      | GraphPad Software | San Diego, CA, USA | Statistics          |

---

Uncropped membranes

Full unedited gel for Fig 2E-F  
and Fig S4 C-D

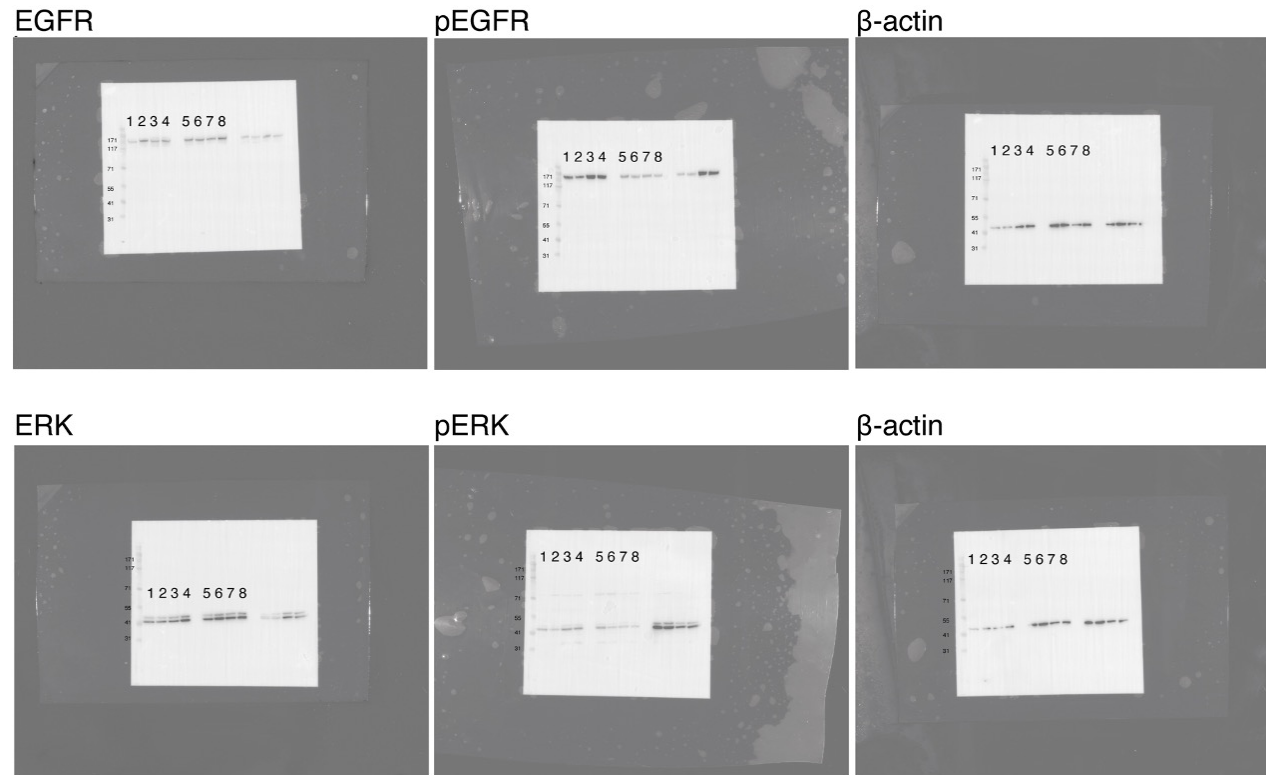

Samples

Lane

1: ARK1 treated with DMSO for 12 hrs  
2: ARK1 treated with GB1107 for 12 hrs  
3: ARK2 treated with DMSO for 12 hrs  
4: ARK2 treated with GB1107 for 12 hrs

5: ARK1 treated with DMSO for 72 hrs  
6: ARK1 treated with GB1107 for 72 hrs  
7: ARK2 treated with DMSO for 72 hrs  
8: ARK2 treated with GB1107 for 72 hrs

Full unedited gel for Fig 3G

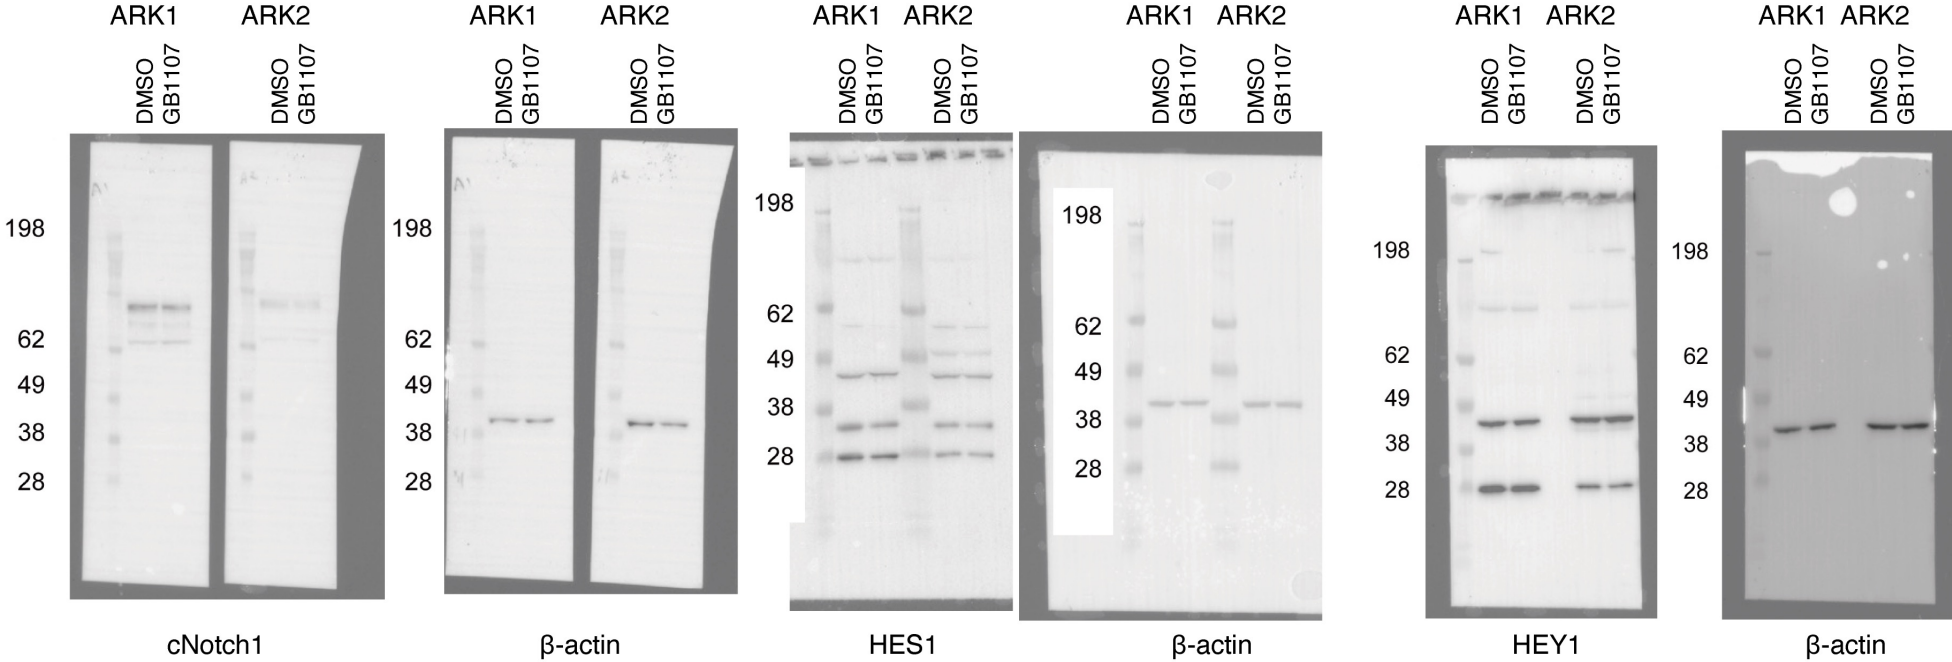



Full unedited gel for Fig 4J

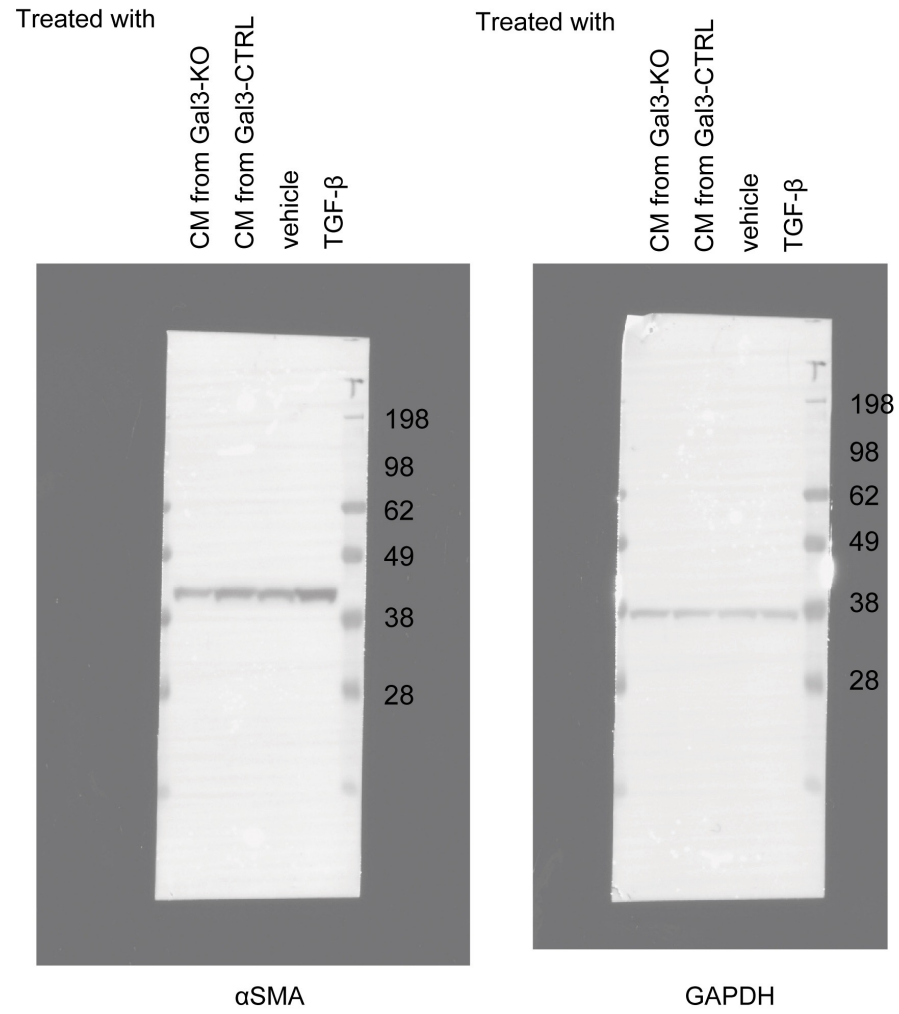

Full unedited gel for Fig S2A

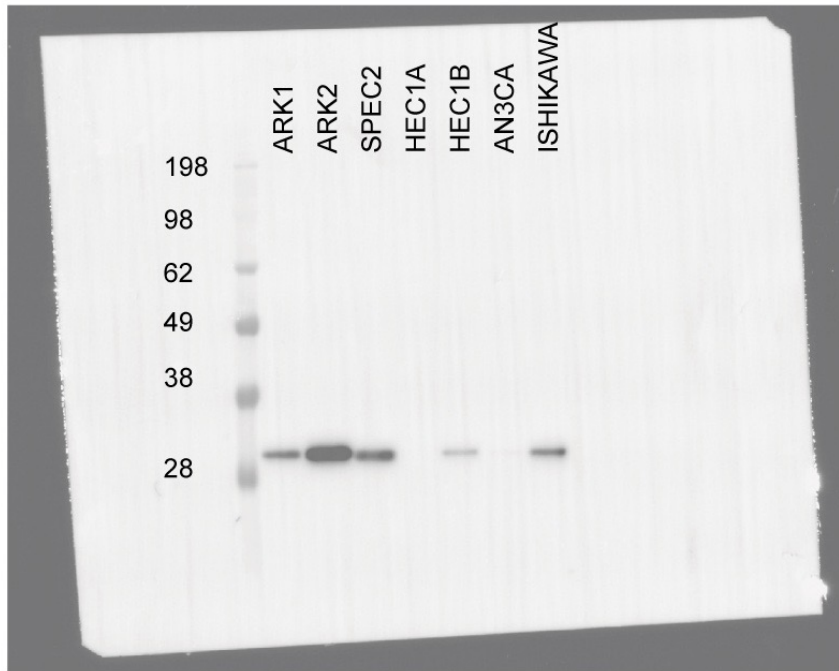

Gal3

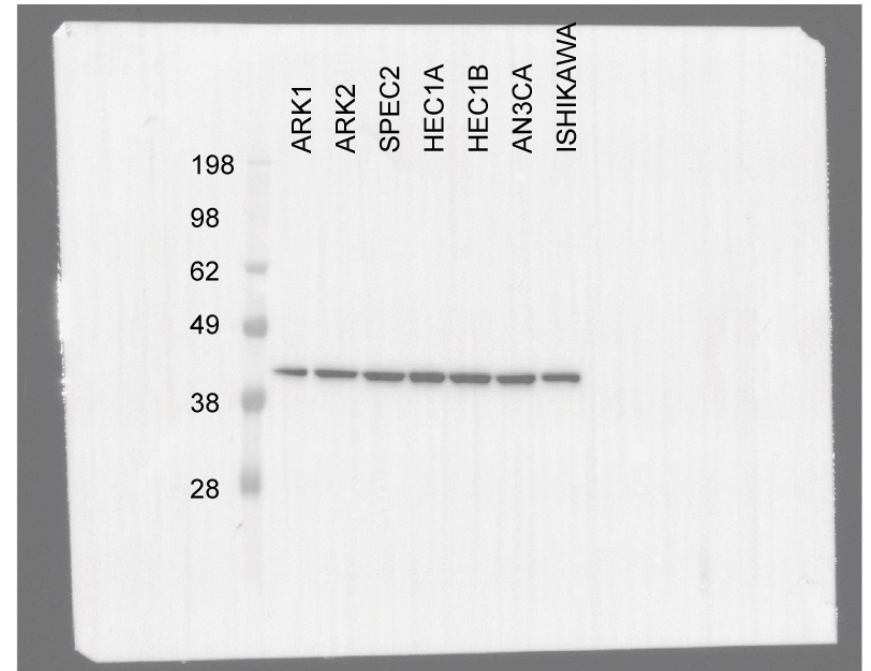

$\beta$ -actin

Full unedited gel for Fig. S2D

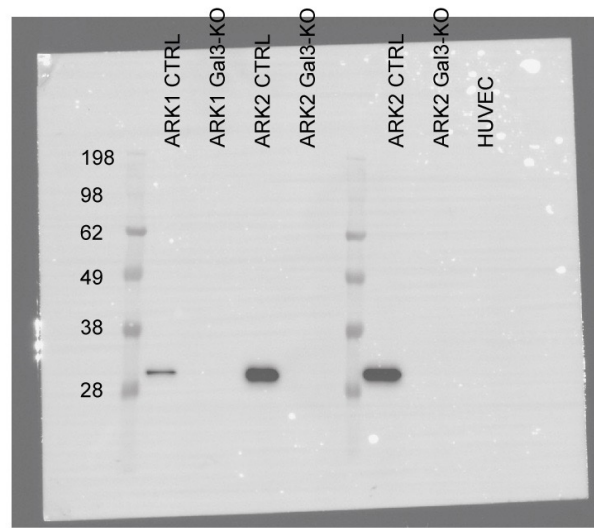

Gal3

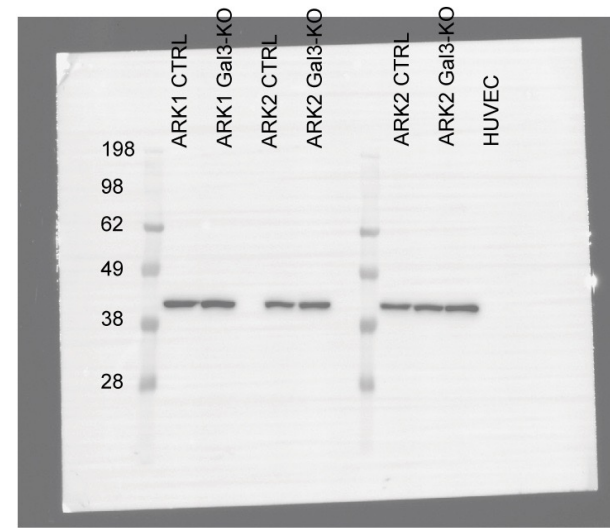

$\beta$ -actin

Full unedited gel for Fig S3E, F

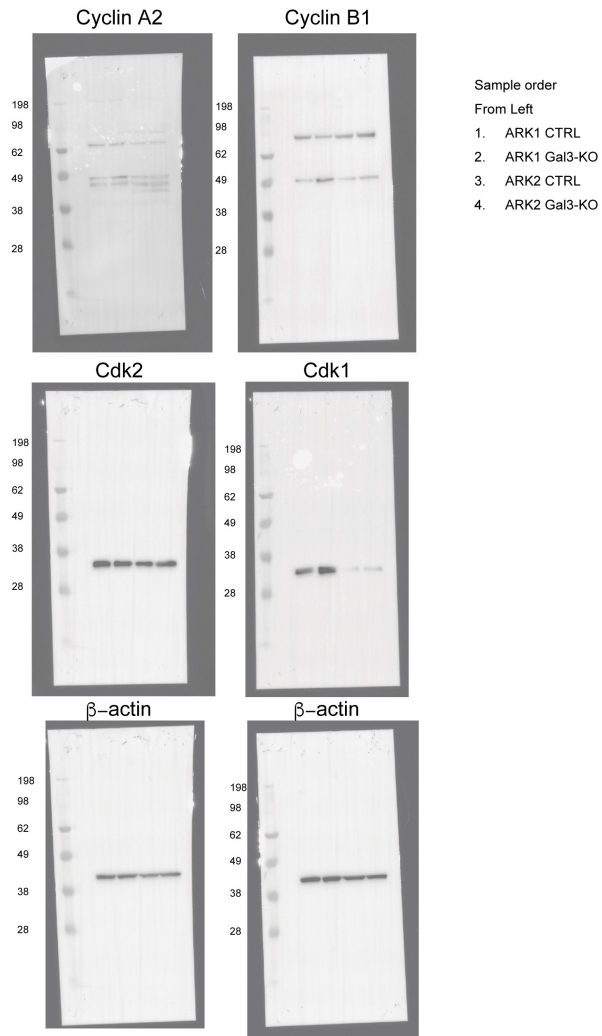

Full unedited gel for Fig S4A-B

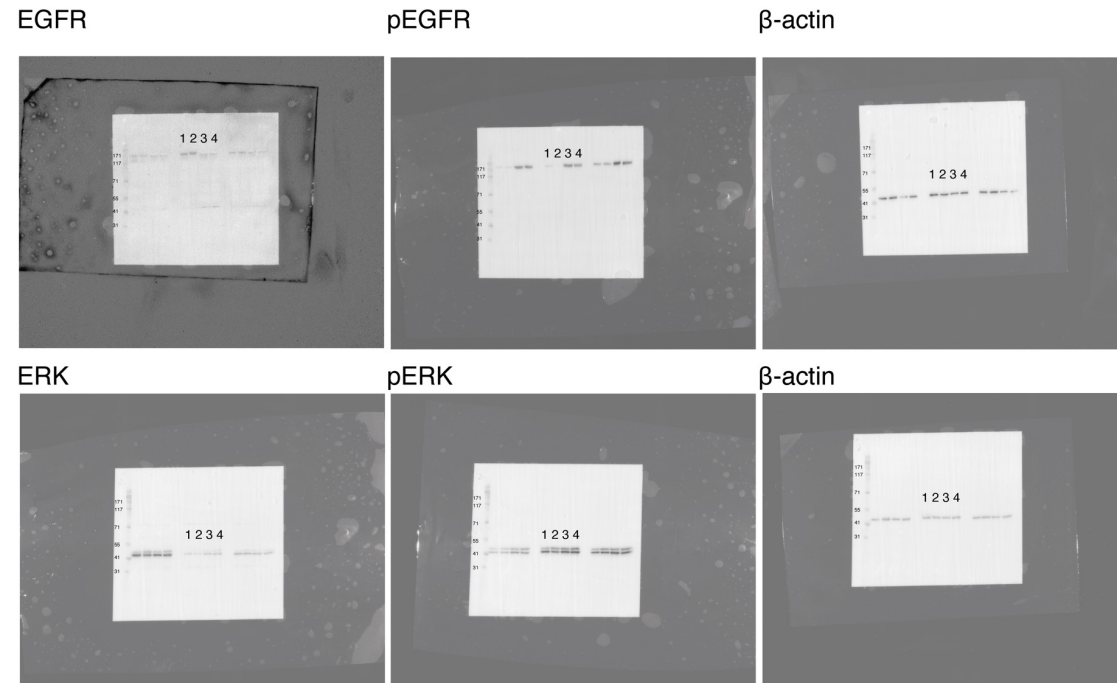

Samples

Lane

- |                   |                   |
|-------------------|-------------------|
| 1: ARK1 Gal3-CTRL | 3: ARK2 Gal3-CTRL |
| 2: ARK1 Gal3-KO   | 4: ARK2 Gal3-KO   |

Supplementary Fig. S5

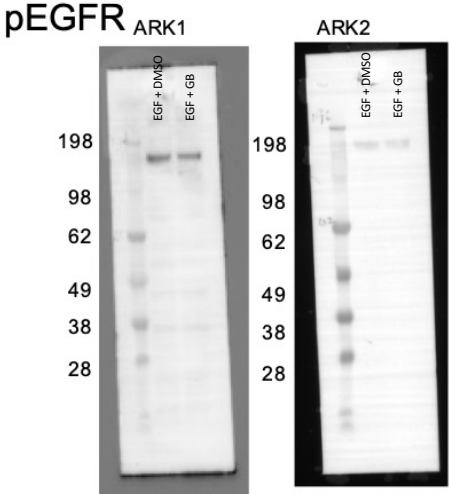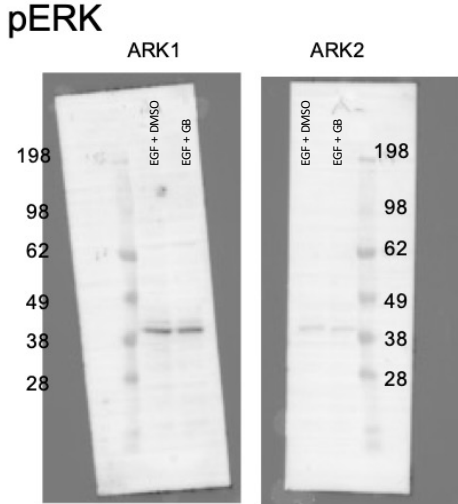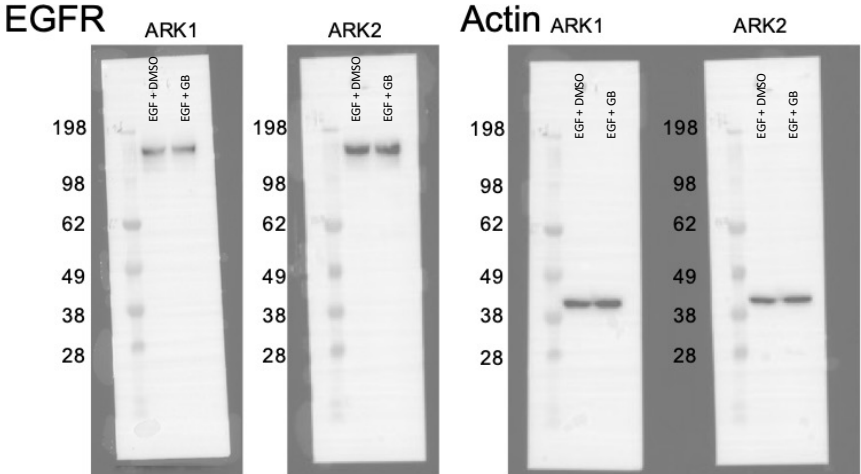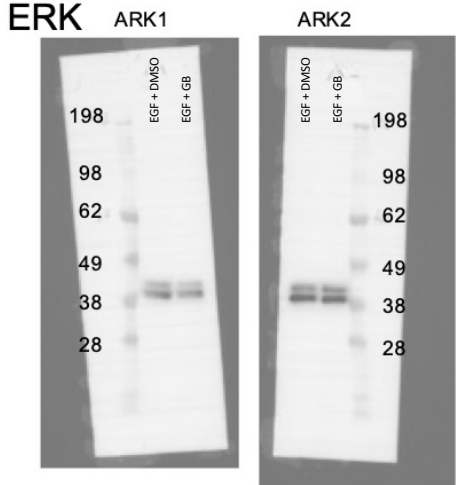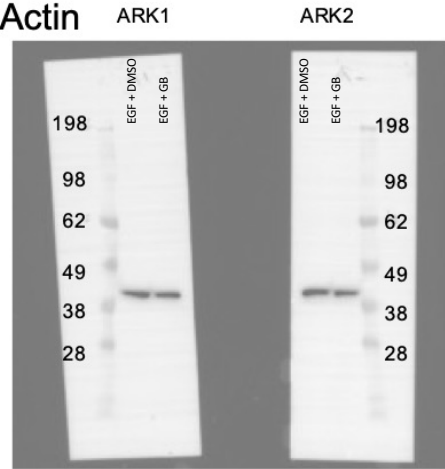

Full unedited gel for Supplementary Fig. S9

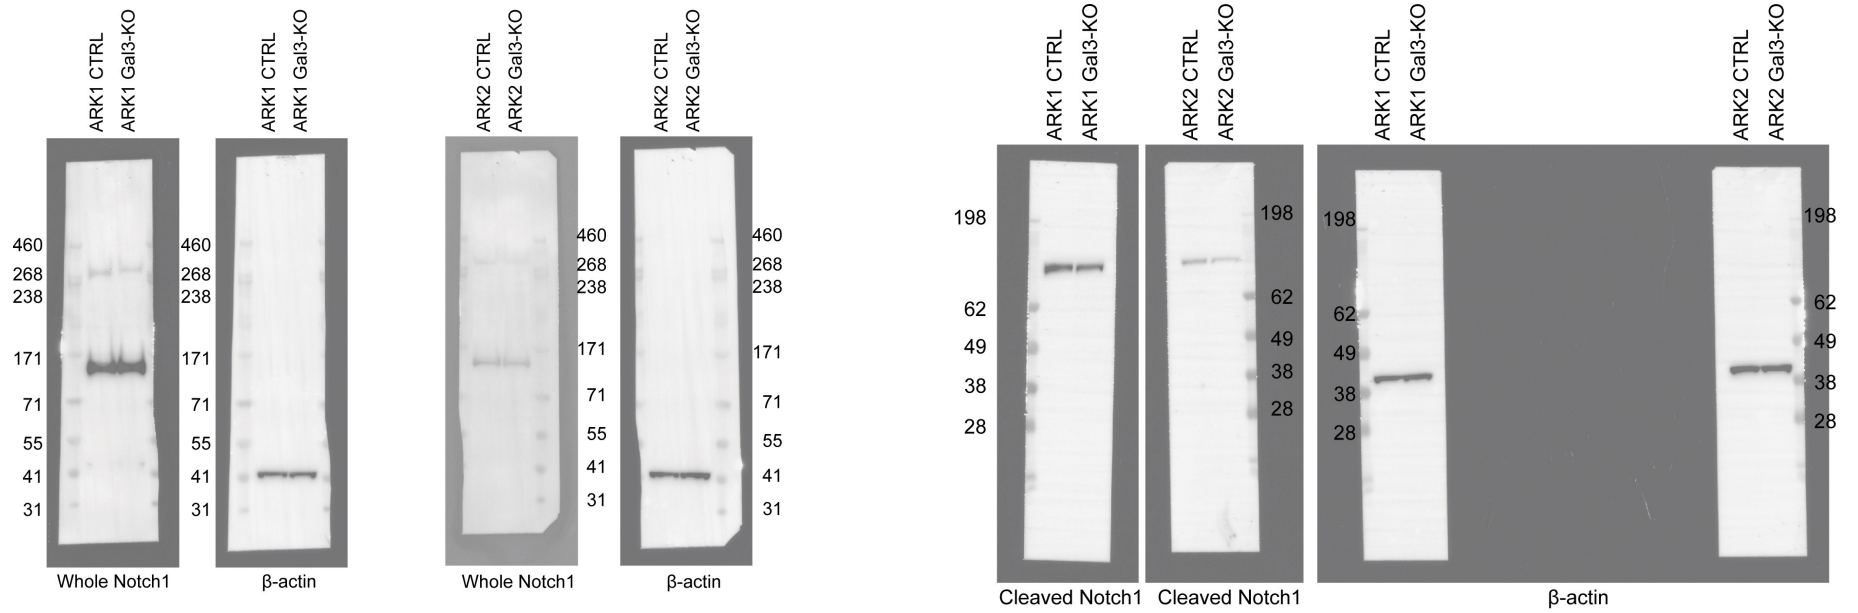

Supplement: 41416_2024_2621_MOESM1_ESM.pdf [file 41416_2024_2621_MOESM1_ESM.pdf]
